# Supplementary material for: Diversity among blaKPC-containing plasmids in Escherichia coli and other bacterial species isolated from the same patients
Source: PubMed Central journal article supplement (PMC6035167; doi:10.1038/s41598-018-28085-7), 2018-07-06
Supplement: 41598_2018_28085_MOESM1_ESM.pdf [file 41598_2018_28085_MOESM1_ESM.pdf]

**Supplemental Information for:**

Diversity among *bla*<sub>KPC</sub>-containing plasmids in *Escherichia coli* and other bacterial species isolated from the same patients

Tracy H. Hazen<sup>1,2</sup>, Roberta Mettus<sup>3</sup>, Christi L. McElheny<sup>3</sup>, Sarah L. Bowler<sup>3</sup>, Sushma Nagaraj<sup>1</sup>, Yohei Doi,<sup>3,4\*</sup> and David A. Rasko<sup>1,2\*</sup>

<sup>1</sup>Institute for Genome Sciences, <sup>2</sup>Department of Microbiology and Immunology, University of Maryland School of Medicine, Baltimore, MD, 21201, <sup>3</sup>Division of Infectious Diseases and Center for Innovative Antimicrobial Therapy, University of Pittsburgh School of Medicine, Pittsburgh, PA, USA, <sup>4</sup>Department of Microbiology, Fujita Health University, Aichi, Japan

Running title: Diversity of *bla*<sub>KPC</sub>-containing plasmids

\* Corresponding Author:

David A. Rasko  
University of Maryland School of Medicine  
Institute for Genome Sciences  
Department of Microbiology and Immunology  
801 W. Baltimore Street, Suite 619  
Baltimore, MD 21201  
Phone: 410.706.6774  
E-mail: [drasko@som.umaryland.edu](mailto:drasko@som.umaryland.edu)

Yohei Doi  
Division of Infectious Diseases,  
Center for Innovative Antimicrobial Therapy,  
University of Pittsburgh School of Medicine,  
S829 Scaife Hall, 3550 Terrace Street,  
Pittsburgh, PA 15261, USA.  
Phone: +1-412-648-9445;  
E-mail: [yod4@pitt.edu](mailto:yod4@pitt.edu)

File contains:

4 Supplemental Figures.  
7 Supplemental Tables.

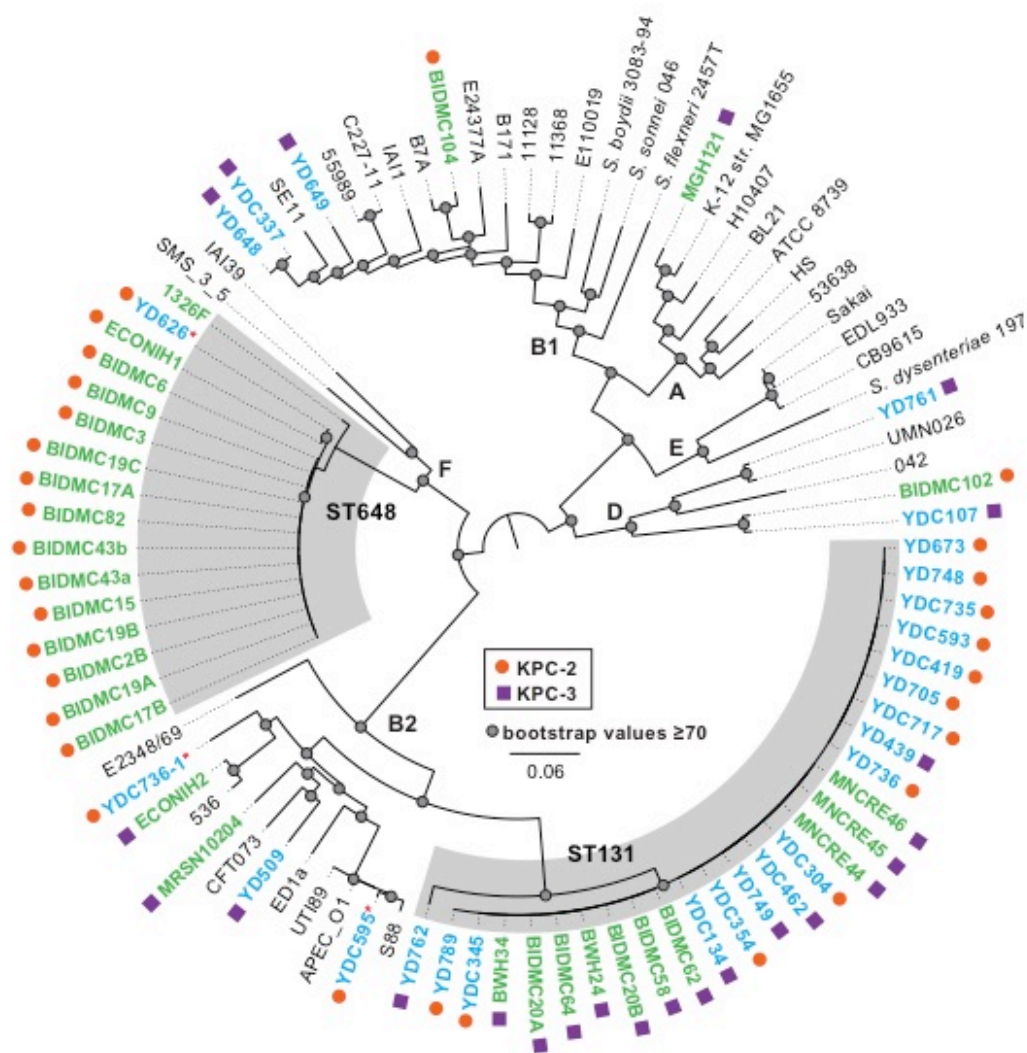

**Figure S1.** Phylogenomic analysis of the *bla*<sub>KPC</sub>-containing *E. coli* analyzed. A SNP-based phylogeny with 225,323 conserved SNP sites relative to the genome of *E. coli* strain IA139 of phylogroup F was inferred to compare the genomes of *bla*<sub>KPC</sub>-containing *E. coli* sequenced in this study with publicly-available *bla*<sub>KPC</sub>-containing *E. coli*. The *bla*<sub>KPC</sub>-containing *E. coli* genomes analyzed in the current study have blue strain labels, while the previously-sequenced *bla*<sub>KPC</sub>-containing *E. coli* that are publicly available have green strain labels. The genomes that contained the *bla*<sub>KPC-2</sub> gene are indicated by an

orange circle, while the genomes with the *bla*<sub>KPC-3</sub> gene are indicated by a purple rectangle. The three genomes that contained *bla*<sub>KPC-2</sub> on Tn4401*b* are labeled with a red asterisk, while the other *bla*<sub>KPC-2</sub>-containing genomes have *bla*<sub>KPC-2</sub> on Tn4401*a* and the *bla*<sub>KPC-3</sub> genomes have *bla*<sub>KPC-3</sub> on Tn4401*b*. Boldface letters designated the *E. coli* phylogroups (A, B1, B2, D, E, and F). A gray circle indicates bootstrap values  $\geq 70$ , while the scale bar indicates the approximate distance of 0.06 nucleotide substitutions per site.

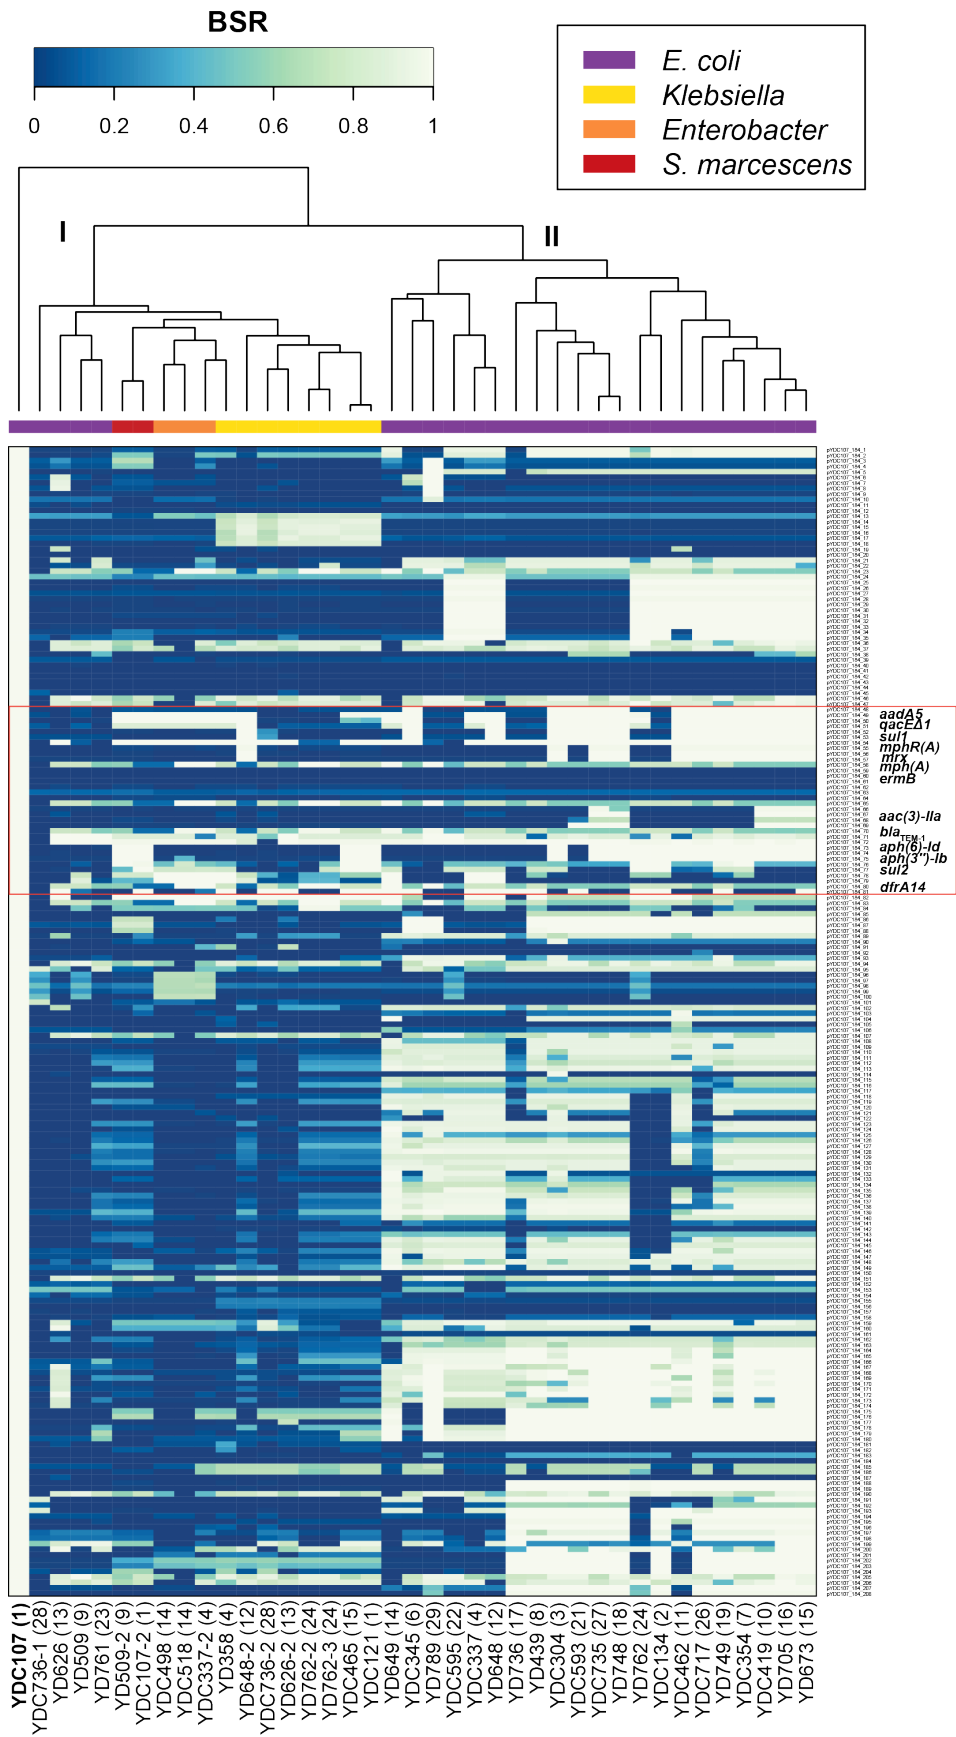

**Figure S2.** *In silico* detection of plasmid pYDC107\_184 in the *bla*<sub>KPC</sub>-containing *E. coli* and other bacterial species isolated from the same patients. The heat map contains BSR values indicating the presence (very light green) or absence (dark blue) of each of the pYDC107\_184 protein-coding genes in each of the genomes analyzed in this study. The heat map was constructed with the heatmap.2 function of gplots with R v.3.4.1. Rows represent the protein-coding genes of pYDC107\_184, while each column represents a different genome. The species and/or genus of each genome is indicated by a square at the top of the heat map (see Figure legend). The label of the *E. coli* YDC107 genome is in bold. A red box denotes the region of the plasmid that containing resistance genes, which are labeled on the right margin by their gene names. The patient number (see Table S1) corresponding to each of the strains is indicated in parentheses next to the strain number.

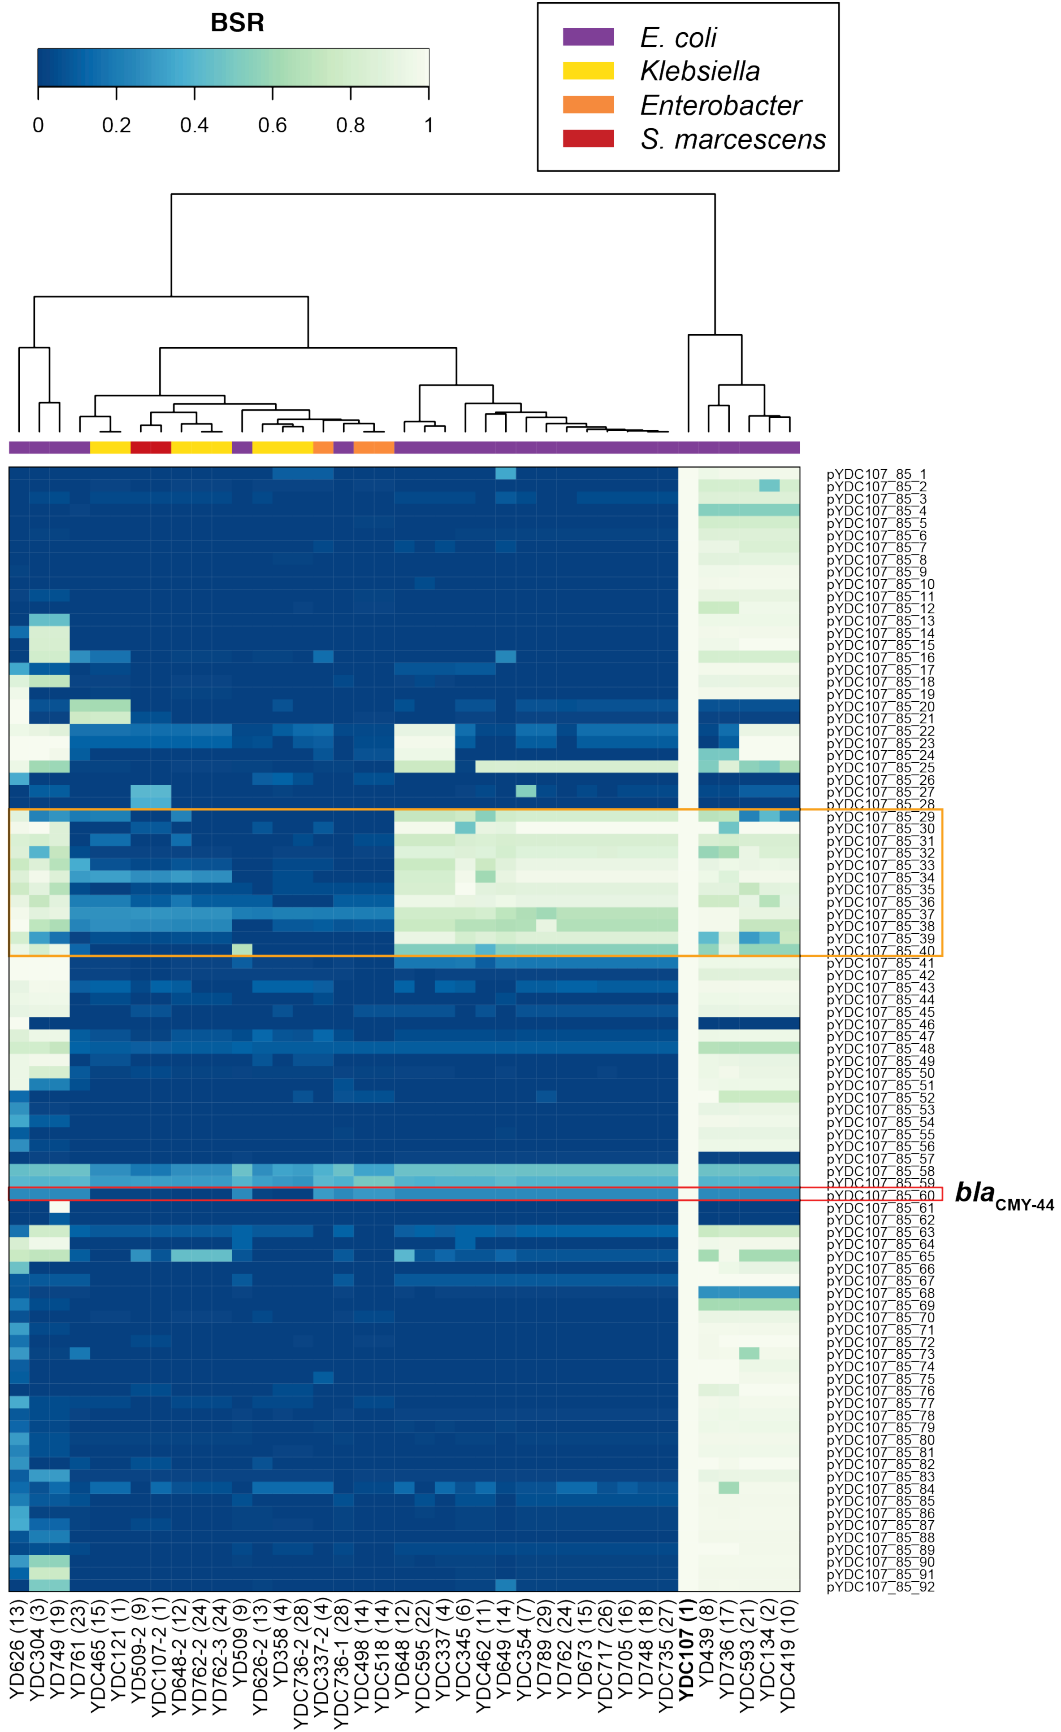

**Figure S3.** *In silico* detection of plasmid pYDC107\_85 in the *bla*<sub>KPC</sub>-containing *E. coli* and other bacterial species isolated from the same patients. The heat map contains BSR values indicating the presence (very light green) or absence (dark blue) of each plasmid gene in each of the genomes. The heat map was constructed with the heatmap.2 function of gplots using R v.3.4.1. Rows represent each of the protein-coding genes of pYDC107\_85, while each column represents a different genome. The label of the *E. coli* YDC107 genome is in bold. The species and/or genus of each genome is indicated by a square at the top of the heat map (see inset legend). A red box indicates the location of the antibiotic resistance gene *bla*<sub>CMY-44</sub>. The patient number (see Table S1) corresponding to each of the strains is indicated in parentheses next to the strain number.

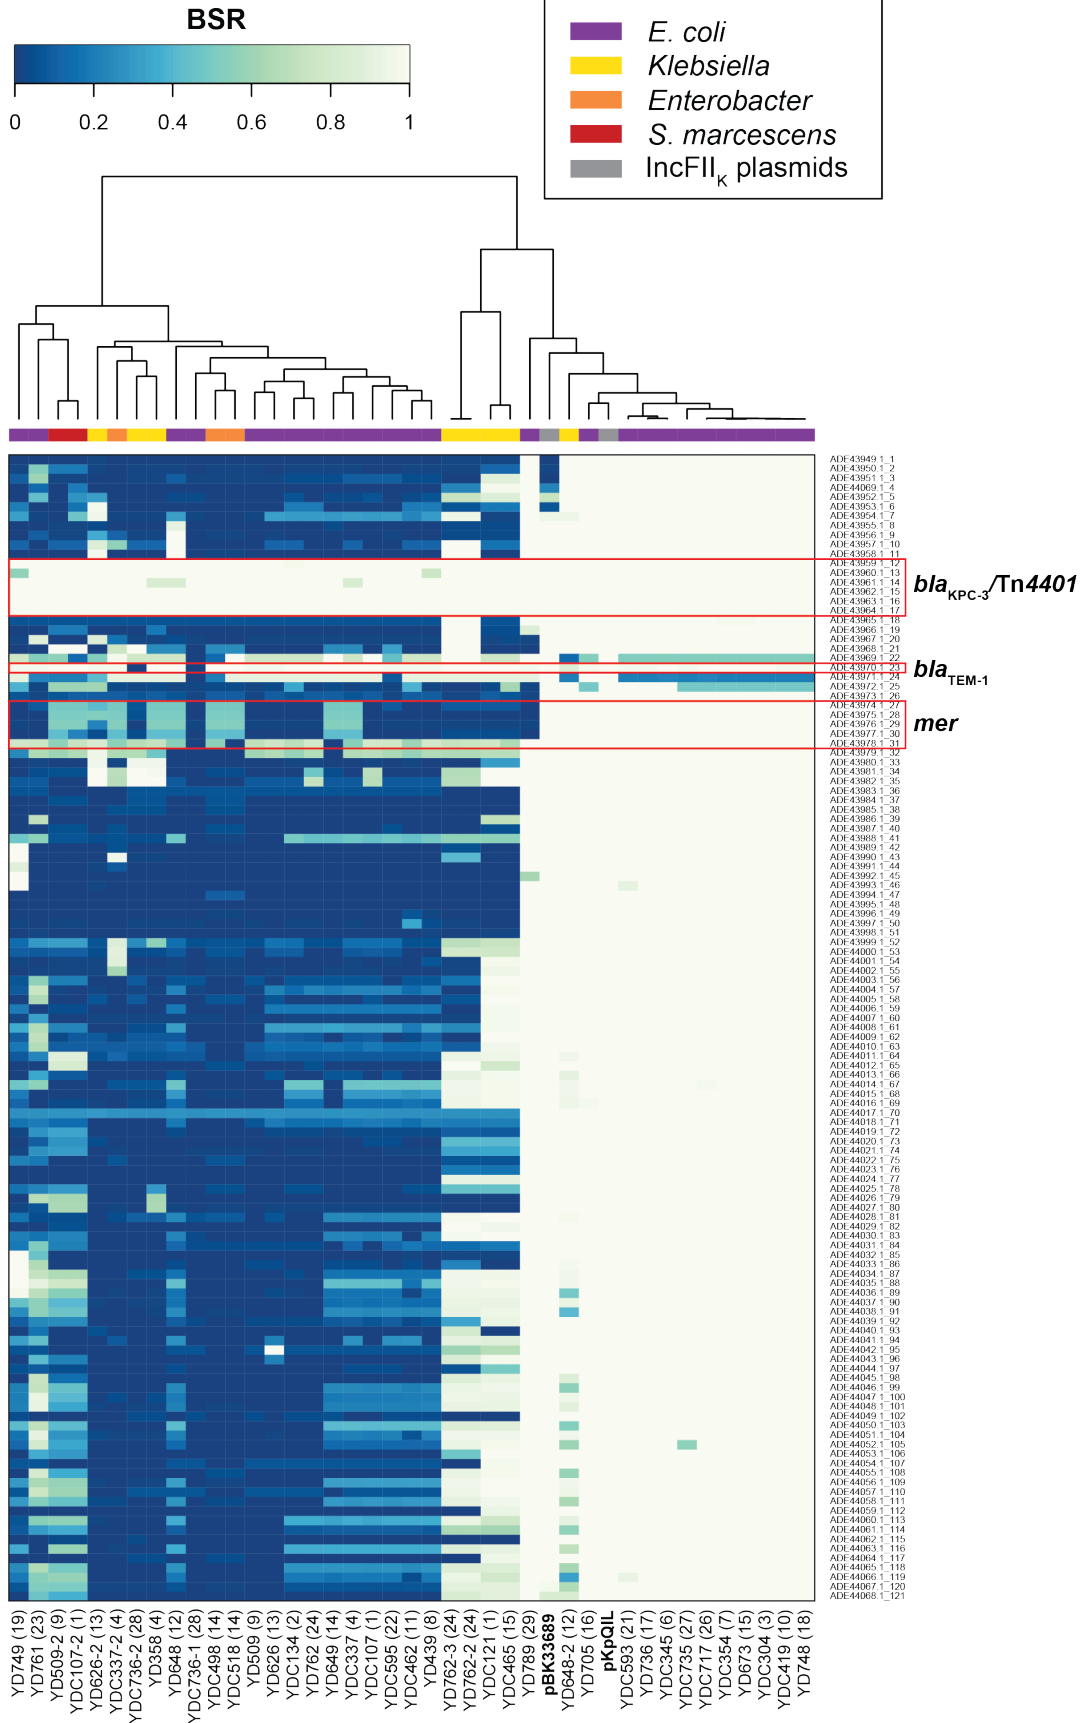



**Figure S4.** *In silico* detection of the IncFII<sub>K</sub> plasmid pKpQIL (GenBank accession no. GU595196.1) in the *bla*<sub>KPC</sub>-containing *E. coli* and other bacterial species analyzed in this study. The heat map contains BSR values indicating the presence (very light green) or absence (dark blue) of each plasmid gene in each of the genomes. The heat map was constructed with the heatmap.2 function of gplots using R v.3.4.1. Rows represent each of the protein-coding genes of pYDC107\_85, while each column represents a different genome. The species and/or genus of each genome is indicated by a square at the top of the heat map (see inset legend). The previously sequenced IncFII<sub>K</sub> plasmids pKpQIL (GenBank accession no. GU595196.1) and pBK33689 (Genbank accession no. KU295133.1) are indicated by a purple label and are in bold. Red boxes indicate the locations of the *bla*<sub>KPC-3</sub>/Tn4401 region, *bla*<sub>TEM-1</sub>, and mercury resistance genes (*mer*). The patient number (see Table S1) corresponding to each of the strains is indicated in parentheses next to the strain number.

**Table S1.** Genomes sequenced in this study

| Patient and Strain |                         |          |      |                        | Genome Characteristics                         |                      |                                        |                                |                |                                                                                                                               |                                               |                                              |                                 |                | Genome Assembly Details |       |                   |  |
|--------------------|-------------------------|----------|------|------------------------|------------------------------------------------|----------------------|----------------------------------------|--------------------------------|----------------|-------------------------------------------------------------------------------------------------------------------------------|-----------------------------------------------|----------------------------------------------|---------------------------------|----------------|-------------------------|-------|-------------------|--|
| Patient No.        | Species                 | Strain   | Year | Strain Source          | <i>E. coli</i> Molecular Serotype <sup>a</sup> | ST (CC) <sup>b</sup> | <i>E. coli</i> Phylogroup <sup>c</sup> | <i>bla</i> <sub>SHV</sub> Gene | Tn4401 isoform | Plasmids                                                                                                                      | Size of <i>bla</i> <sub>SHV</sub> contig (bp) | Inc-type of <i>bla</i> <sub>SHV</sub> contig | Similarity with IncN or IncFlik | No. of Contigs | Genome Size (Mb)        | GC %  | Accession No.     |  |
| 1                  | <i>E. coli</i>          | YDC107   | 2008 | (Sidjabat et al. 2009) | O102:H6                                        | 964                  | D                                      | <i>bla</i> <sub>SHV-3</sub>    | Tn4401b        | IncI1(AP005147), IncFIA(AP001918), IncFIB(AP001918), IncFII(AY458016), IncN(AY046276)                                         | 70,372                                        | IncN                                         | IncN                            | 7              | 5.65                    | 50.62 | CP025710-CP025713 |  |
| 1                  | <i>K. pneumoniae</i>    | YDC121   | 2008 | This study             | ND                                             | 37                   | ND                                     | <i>bla</i> <sub>SHV-3</sub>    | Tn4401b        | Col(MG828), IncFII(pKCP91), Col(BSS12), IncN(AY046276), IncFIB <sub>2</sub>                                                   | 15,781                                        | none                                         | IncN, IncFII <sub>2</sub> -like | 123            | 5.53                    | 57.20 | PGID00000000      |  |
| 1                  | <i>S. marcescens</i>    | YDC107-2 | 2009 | This study             | ND                                             | ND                   | ND                                     | <i>bla</i> <sub>SHV-3</sub>    | Tn4401b        | IncHI2A, IncL(MpMU407), Col(MG828), IncFII(pCRY), IncN(AY046276), ColRNAI, IncFIB <sub>2</sub> , Col(BSS12)                   | 11,719                                        | none                                         | IncN                            | 187            | 5.78                    | 58.34 | PGIC00000000      |  |
| 2                  | <i>E. coli</i>          | YDC134   | 2008 | (Kim et al. 2012)      | O25:H4                                         | 131                  | B2                                     | <i>bla</i> <sub>SHV-3</sub>    | Tn4401b        | IncI1, Col(BSS12), Col(MG828), IncN(AY046276), IncFII(pRSB107), IncFIA(AP001918), IncFIB(AP001918)                            | 12,168                                        | none                                         | IncN                            | 197            | 5.34                    | 50.73 | PGIB00000000      |  |
| 3                  | <i>E. coli</i>          | YDC304   | 2009 | (Kim et al. 2012)      | O25:H4                                         | 131                  | B2                                     | <i>bla</i> <sub>SHV-2</sub>    | Tn4401a        | IncFIB(pQII), IncFII <sub>2</sub> , IncFIA(AP001918), Col(BSS12), IncFIB(AP001918), IncI1                                     | 62,630                                        | IncFII <sub>2</sub>                          | IncFII <sub>2</sub>             | 156            | 5.28                    | 50.8  | PGIA00000000      |  |
| 4                  | <i>E. coli</i>          | YDC337   | 2009 | (Kim et al. 2012)      | O147:H7                                        | 2521                 | B1                                     | <i>bla</i> <sub>SHV-3</sub>    | Tn4401b        | Col(MG828), IncFII(29), IncA/C <sub>2</sub> , IncN(AY046276), Col(BSS12)                                                      | 6,975                                         | none                                         | IncN                            | 135            | 5.04                    | 50.81 | PGH200000000      |  |
| 4                  | <i>E. asburiae</i>      | YDC337-2 | 2009 | This study             | ND                                             | ND                   | ND                                     | <i>bla</i> <sub>SHV-3</sub>    | Tn4401b        | IncA/C <sub>2</sub> , IncH1B(CIT), IncFII(pECLA), IncFIB <sub>2</sub> , Col(BSS12), IncN(AY046276), IncH1A(CIT)               | 10,113                                        | none                                         | IncN                            | 134            | 5.21                    | 55.20 | PGIQ000000000     |  |
| 4                  | <i>K. michiganensis</i> | YD358    | 2009 | This study             | ND                                             | ND                   | ND                                     | <i>bla</i> <sub>SHV-3</sub>    | Tn4401b        | Col(MG828), repA(pKPC-CAV1321), IncN(AY046276), Col(BSS12), IncA/C <sub>2</sub>                                               | 6,975                                         | none                                         | IncN                            | 163            | 6.66                    | 55.46 | PGIP000000000     |  |
| 6                  | <i>E. coli</i>          | YDC345   | 2009 | (Kim et al. 2012)      | O25:H4                                         | 131                  | B2                                     | <i>bla</i> <sub>SHV-2</sub>    | Tn4401a        | IncFIB(pQII), IncFII <sub>2</sub> , IncFII(AY458016), Col(BSS12)                                                              | 63,342                                        | IncFII <sub>2</sub>                          | IncFII <sub>2</sub>             | 140            | 5.28                    | 50.71 | PGHY000000000     |  |
| 7                  | <i>E. coli</i>          | YDC354   | 2009 | (Kim et al. 2012)      | O25:H4                                         | 131                  | B2                                     | <i>bla</i> <sub>SHV-2</sub>    | Tn4401a        | IncFIB(pQII), IncFII(pRSB107), IncFIA(AP001918), IncX4, Col(BSS12), IncFIB(AP001918)                                          | 9,907                                         | none                                         | IncFII <sub>2</sub>             | 151            | 5.26                    | 50.77 | PGHX000000000     |  |
| 8                  | <i>E. coli</i>          | YD439    | 2009 | (Kim et al. 2012)      | O25:H4                                         | 131                  | B2                                     | <i>bla</i> <sub>SHV-3</sub>    | Tn4401b        | IncFII(pRSB107), Col(MG828), IncI1(AP005147), IncFIB(AP001918), p0111(AP010962), IncFIA(AP001918), IncN(AY046276), Col(BSS12) | 11,087                                        | none                                         | IncN                            | 145            | 5.28                    | 50.72 | PGHW000000000     |  |
| 9                  | <i>E. coli</i>          | YD509    | 2010 | (Kim et al. 2012)      | O18ac:H31                                      | 372                  | B2                                     | <i>bla</i> <sub>SHV-3</sub>    | Tn4401b        | Col(BSS12), repA(pKPC-2)                                                                                                      | 10,006                                        | none                                         | none                            | 84             | 4.81                    | 50.44 | PGHV000000000     |  |
| 9                  | <i>S. marcescens</i>    | YD509-2  | 2010 | This study             | ND                                             | ND                   | ND                                     | <i>bla</i> <sub>SHV-3</sub>    | Tn4401b        | IncLM, IncHI2A, Col(BSS12), IncFIB <sub>2</sub> , IncFII(pCRY)                                                                | 11,719                                        | none                                         | none                            | 168            | 5.79                    | 58.17 | PGHU000000000     |  |
| 10                 | <i>E. coli</i>          | YDC419   | 2010 | (Kim et al. 2012)      | O25:H4                                         | 131                  | B2                                     | <i>bla</i> <sub>SHV-2</sub>    | Tn4401a        | ColRNAI, IncFII(pRSB107), Col(BSS12), IncI1(AP005147), IncFII <sub>2</sub> , IncFIB(pQII), IncFIB(AP001918), IncFIA(AP001918) | 62,630                                        | IncFII <sub>2</sub>                          | IncFII <sub>2</sub>             | 148            | 5.32                    | 50.84 | PGHT000000000     |  |
| 11                 | <i>E. coli</i>          | YDC462   | 2011 | (Kim et al. 2012)      | O25:H4                                         | 131                  | B2                                     | <i>bla</i> <sub>SHV-3</sub>    | Tn4401b        | Col(BSS12), IncFIA(AP001918), IncFIB(AP001918), IncFII(AY458016), IncFII(pRSB107)                                             | 12,357                                        | none                                         | none                            | 168            | 5.12                    | 50.75 | PGHS000000000     |  |
| 12                 | <i>E. coli</i>          | YD648    | 2011 | (Kim et al. 2012)      | O147:H7                                        | 2521                 | B1                                     | <i>bla</i> <sub>SHV-3</sub>    | Tn4401b        | IncFII(29), IncFIB(AP001918), IncA/C <sub>2</sub> , IncN(AY046276), Col156, Col(BSS12), IncX1                                 | 6,975                                         | none                                         | IncN                            | 185            | 5.11                    | 50.73 | PGHR000000000     |  |
| 12                 | <i>K. pneumoniae</i>    | YD648-2  | 2011 | This study             | ND                                             | 258                  | ND                                     | <i>bla</i> <sub>SHV-2</sub>    | Tn4401a        | Col(MG828), IncR, IncFII <sub>2</sub> , ColRNAI, IncX3, IncFIB(pQII), Col(BSS12)                                              | 20,615                                        | none                                         | IncFII <sub>2</sub>             | 147            | 5.55                    | 57.20 | PGHQ000000000     |  |
| 13                 | <i>E. coli</i>          | YD626    | 2011 | (Kim et al. 2012)      | O1:H6                                          | 648                  | F                                      | <i>bla</i> <sub>SHV-2</sub>    | Tn4401b*       | Col(BSS12), IncN(AY046276)                                                                                                    | 20,704                                        | none                                         | IncN                            | 138            | 5.26                    | 50.52 | PGHP000000000     |  |
| 13                 | <i>K. varicola</i>      | YD626-2  | 2011 | This study             | ND                                             | 454                  | ND                                     | <i>bla</i> <sub>SHV-2</sub>    | Tn4401b*       | IncFIA(pBK30683), IncH1B(JN420336), IncFII <sub>2</sub> , IncN(AY046276), Col(BSS12)                                          | 20,494                                        | none                                         | IncN                            | 154            | 5.83                    | 57.03 | PGIO000000000     |  |
| 14                 | <i>E. coli</i>          | YD649    | 2011 | (O'Hara et al. 2014)   | ONT:H49                                        | 5743                 | B1                                     | <i>bla</i> <sub>SHV-3</sub>    | Tn4401b*       | IncFII(29), IncFIB(AP001918), IncA/C <sub>2</sub> , Col(MG828), IncI2, Col(BSS12)                                             | 10,006                                        | none                                         | none                            | 91             | 5.05                    | 50.76 | PGIH000000000     |  |
| 14                 | <i>E. hormaechei</i>    | YDC498   | 2011 | This study             | ND                                             | ND                   | ND                                     | <i>bla</i> <sub>SHV-3</sub>    | Tn4401b        | IncA/C <sub>2</sub> , Col(BSS12)                                                                                              | 14,153                                        | none                                         | none                            | 81             | 4.64                    | 55.19 | PGIN000000000     |  |
| 14                 | <i>E. hormaechei</i>    | YDC518   | 2011 | This study             | ND                                             | ND                   | ND                                     | <i>bla</i> <sub>SHV-3</sub>    | Tn4401b        | IncA/C <sub>2</sub> , Col(MG828), Col(BSS12)                                                                                  | 14,167                                        | none                                         | none                            | 92             | 4.62                    | 55.21 | PGIM000000000     |  |
| 15                 | <i>E. coli</i>          | YD673    | 2011 | (O'Hara et al. 2014)   | O25:H4                                         | 131                  | B2                                     | <i>bla</i> <sub>SHV-2</sub>    | Tn4401a        | IncFIB(pQII), Col(BSS12), IncFIB(AP001918), IncFIA(AP001918), IncFII <sub>2</sub> , IncFII(pRSB107), IncN(AY046276)           | 9,907                                         | none                                         | IncN, IncFII <sub>2</sub>       | 170            | 5.32                    | 50.82 | PGHN000000000     |  |
| 15                 | <i>K. pneumoniae</i>    | YDC465   | 2011 | This study             | ND                                             | 37                   | ND                                     | <i>bla</i> <sub>SHV-3</sub>    | Tn4401b        | Col(BSS12), Col(MG828), IncFII(pKCP91), IncX3, IncFIB <sub>2</sub> , ColRNAI, IncN(AY046276)                                  | 10,006                                        | none                                         | IncN, IncFII <sub>2</sub> -like | 126            | 5.57                    | 57.12 | PGHM000000000     |  |
| 16                 | <i>E. coli</i>          | YD705    | 2011 | (O'Hara et al. 2014)   | O25:H4                                         | 131                  | B2                                     | <i>bla</i> <sub>SHV-2</sub>    | Tn4401a        | IncFIB(pQII), IncFII(pRSB107), Col(BSS12), Col156, IncFII <sub>2</sub> , IncFIA(AP001918), IncFIB(AP001918)                   | 62,630                                        | IncFII <sub>2</sub>                          | IncFII <sub>2</sub>             | 160            | 5.32                    | 50.82 | PGHL000000000     |  |
| 17                 | <i>E. coli</i>          | YD736    | 2012 | (O'Hara et al. 2014)   | O25:H4                                         | 131                  | B2                                     | <i>bla</i> <sub>SHV-2</sub>    | Tn4401a        | IncI1, IncFIB(pQII), IncFII <sub>2</sub> , IncFIA(AP001918), Col(BSS12)                                                       | 18,604                                        | none                                         | IncFII <sub>2</sub>             | 136            | 5.2                     | 50.78 | PGHK000000000     |  |
| 18                 | <i>E. coli</i>          | YD748    | 2012 | (O'Hara et al. 2014)   | O25:H4                                         | 131                  | B2                                     | <i>bla</i> <sub>SHV-2</sub>    | Tn4401a        | Col(BSS12), IncFII <sub>2</sub> , IncFIB(pQII), IncFIA(AP001918), IncFII(pRSB107), IncFIB(AP001918)                           | 62,630                                        | IncFII <sub>2</sub>                          | IncFII <sub>2</sub>             | 147            | 5.19                    | 50.85 | PGHJ000000000     |  |
| 19                 | <i>E. coli</i>          | YD749    | 2012 | (O'Hara et al. 2014)   | O25:H4                                         | 131                  | B2                                     | <i>bla</i> <sub>SHV-2</sub>    | Tn4401b        | Col(BSS12), IncI1, IncFII(pHNTAB), IncN(AY046276), IncFIA(AP001918), ColRNAI, IncFIB(AP001918)                                | 6,466                                         | none                                         | IncN                            | 232            | 5.36                    | 50.79 | PGHI000000000     |  |
| 21                 | <i>E. coli</i>          | YDC593   | 2012 | This study             | O25:H4                                         | 131                  | B2                                     | <i>bla</i> <sub>SHV-2</sub>    | Tn4401a        | IncFII <sub>2</sub> , IncI1, Col(BSS12), IncFIA(AP001918), IncFII(pRSB107), IncFIB(pQII), IncFIB(AP001918)                    | 31,972                                        | IncFII <sub>2</sub>                          | IncFII <sub>2</sub>             | 149            | 5.27                    | 50.81 | PGHH000000000     |  |
| 22                 | <i>E. coli</i>          | YDC595   | 2013 | This study             | O50/O2:H7                                      | 95 (95)              | B2                                     | <i>bla</i> <sub>SHV-2</sub>    | Tn4401b*       | Col(MG828), IncFII(29), Col156, Col(BSS12), ColRNAI, IncFIB(AP001918)                                                         | 22,053                                        | none                                         | none                            | 104            | 5.1                     | 50.60 | PGHF000000000     |  |
| 23                 | <i>E. coli</i>          | YD761    | 2014 | This study             | O15:H18                                        | 69 (69)              | D                                      | <i>bla</i> <sub>SHV-3</sub>    | Tn4401b        | Col(BSS12), IncFII(CP000670)                                                                                                  | 78,880                                        | IncFII(CP000670)                             | none                            | 118            | 5.1                     | 50.64 | PGHG000000000     |  |
| 24                 | <i>E. coli</i>          | YD762    | 2014 | This study             | O16:H5                                         | 131                  | B2                                     | <i>bla</i> <sub>SHV-3</sub>    | Tn4401b        | IncFIA(AP001918), Col(MG828), IncFII(pRSB107), Col(BSS12), Col156, IncN(AY046276), IncFIB(pB171)                              | 11,026                                        | none                                         | IncN                            | 124            | 4.91                    | 50.77 | PGHE000000000     |  |
| 24                 | <i>K. pneumoniae</i>    | YD762-2  | 2015 | This study             | ND                                             | 258                  | ND                                     | <i>bla</i> <sub>SHV-2</sub>    | Tn4401a        | IncX3, IncFIB <sub>2</sub> , IncFII <sub>2</sub> , Col(BSS12), IncN(AY046276), IncR, ColRNAI                                  | 64,566                                        | IncFII <sub>2</sub>                          | IncFII <sub>2</sub> -like       | 132            | 5.73                    | 56.99 | PGHD000000000     |  |
| 24                 | <i>K. pneumoniae</i>    | YD762-3  | 2014 | This study             | ND                                             | 258                  | ND                                     | <i>bla</i> <sub>SHV-2</sub>    | Tn4401a        | IncR, ColRNAI, IncX3, IncN(AY046276), IncFIB <sub>2</sub> , IncFII <sub>2</sub> , Col(BSS12)                                  | 64,567                                        | IncFII <sub>2</sub>                          | IncFII <sub>2</sub> -like       | 149            | 5.74                    | 56.99 | PGHC000000000     |  |
| 26                 | <i>E. coli</i>          | YDC717   | 2015 | This study             | O25:H4                                         | 131                  | B2                                     | <i>bla</i> <sub>SHV-2</sub>    | Tn4401a        | IncFII(pRSB107), IncFII <sub>2</sub> , IncFIA(AP001918), Col(BSS12), ColRNAI, IncFIB(AP001918)                                | 62,630                                        | IncFII <sub>2</sub>                          | IncFII <sub>2</sub>             | 148            | 5.17                    | 50.82 | PGHB000000000     |  |
| 27                 | <i>E. coli</i>          | YDC735   | 2015 | This study             | O25:H4                                         | 131                  | B2                                     | <i>bla</i> <sub>SHV-2</sub>    | Tn4401a        | IncFIA(AP001918), IncFII <sub>2</sub> , IncFIB(pQII), IncFII(pRSB107), Col(BSS12), IncFIB(AP001918), Col(MG828)               | 45,152                                        | IncFII <sub>2</sub>                          | IncFII <sub>2</sub>             | 136            | 5.22                    | 50.85 | PGHA000000000     |  |
| 28                 | <i>E. coli</i>          | YDC736-1 | 2015 | This study             | O75:H5                                         | 1858                 | B2                                     | <i>bla</i> <sub>SHV-2</sub>    | Tn4401b*       | none                                                                                                                          | 15,997                                        | none                                         | none                            | 62             | 4.84                    | 50.48 | PGGZ000000000     |  |
| 28                 | <i>K. michiganensis</i> | YDC736-2 | 2015 | This study             | ND                                             | ND                   | ND                                     | <i>bla</i> <sub>SHV-2</sub>    | Tn4401b*       | IncN(AY046276), ColRNAI, IncFIB <sub>2</sub>                                                                                  | 14,471                                        | none                                         | IncN                            | 94             | 6.09                    | 55.98 | PGIL000000000     |  |
| 29                 | <i>E. coli</i>          | YD789    | 2015 | This study             | O25:H4                                         | 131                  | B2                                     | <i>bla</i> <sub>SHV-2</sub>    | Tn4401b        | IncFII <sub>2</sub> , IncFIA(AP001918), IncFII(AY458016), IncFIB(pQII)                                                        | 57,798                                        | IncFII <sub>2</sub>                          | IncFII <sub>2</sub>             | 130            | 5.14                    | 50.80 | PGGY000000000     |  |
| 29                 | <i>P. stuartii</i>      | YD789-2  | 2015 | This study             | ND                                             | ND                   | ND                                     | none                           | none           | Col156                                                                                                                        | none                                          | none                                         | none                            | 56             | 4.36                    | 41.28 | PGGX000000000     |  |

<sup>a</sup>Molecular serotypes were predicted for the *E. coli* genomes. ND indicates that a serotype was not applicable for the other bacterial species analyzed.

<sup>b</sup>Multilocus sequence typing (MLST) sequence types (STs) were determined for each *E. coli* genome according to the MLST scheme developed by Wirth et al. (2006). The *K. pneumoniae* STs were determined using the Institut Pasteur website (<http://biqsdb.pasteur.fr>). The clonal complex (CC) is in parentheses.

<sup>c</sup>The phylogroup that each of the *E. coli* genomes occupied in the whole-genome phylogeny. ND indicates a phylogroup determination was not determined because the strain is a species other than *E. coli*.

<sup>d</sup>IncN and IncFIIK indicate that genes with similarity to the IncN plasmid pYDC107\_70 (GenBank accession no. CP025710.1) and/or IncFIIK, plasmid pKpQII (GenBank accession no. GUS95196.1) were identified in the genomes.

**Table S2.** Minimum inhibitory concentrations (MICs) of the bacterial strains analyzed in this study

| Patient No. | Species <sup>a</sup>    | Strain   | ST (CC) <sup>b</sup> | bla <sub>APC</sub> Gene | Other β-lactamase Genes <sup>d</sup>                                                                             | Other Resistance Genes <sup>e</sup>                                                                                     | MIC (µg/ml) <sup>c</sup> |        |     |      |       |     |     |     |     |     |     |     |     |        |        |        |       |      |        |        |        |        |
|-------------|-------------------------|----------|----------------------|-------------------------|------------------------------------------------------------------------------------------------------------------|-------------------------------------------------------------------------------------------------------------------------|--------------------------|--------|-----|------|-------|-----|-----|-----|-----|-----|-----|-----|-----|--------|--------|--------|-------|------|--------|--------|--------|--------|
|             |                         |          |                      |                         |                                                                                                                  |                                                                                                                         | AMK                      | TIM    | ATM | TZP  | SXT   | GEN | TOB | CIP | LVX | DOX | MIN | FEP | CAZ | CTX    | TGC    | ETP    | DOR   | IPM  | MEM    | CST    | POL    |        |
| 1           | <i>E. coli</i>          | YDC107   | 964                  | bla <sub>APC-3</sub>    | bla <sub>OXA-9</sub> , bla <sub>TEM-1</sub> (2 copies), bla <sub>CMY-44</sub>                                    | sul2, aph(6)-Ia, dfrA14, aadA, aac(6)-Ib, aph(3)-Ib, mphA/mrx, aadA5, tet(A), tet(D), aac(3)-IIa, sul1, aph(3)-Ib, ermB | <4                       | >16/2  | 8   | <8/4 | 4/76  | <1  | <1  | 1   | <1  | 8   | <2  | <2  | 8   | 4      | >16/25 | >4     | 2     | 8    | 8      | >16/25 | >16/25 |        |
| 1           | <i>K. pneumoniae</i>    | YDC121   | 37                   | bla <sub>APC-3</sub>    | bla <sub>OXA-9</sub> , bla <sub>TEM-1</sub> , bla <sub>SHV-11</sub>                                              | aadA, aph(3)-Ib, aph(6)-Ia, sul2, aac(6)-Ib, fosA5                                                                      | <4                       | >128/2 | >16 | >6/4 | >4/76 | >8  | >8  | >2  | >8  | 4   | 4   | >16 | >16 | >32    | 0.5    | >4     | >2    | >8   | >8     | >16/25 | >16/25 |        |
| 1           | <i>S. marcescens</i>    | YDC107-2 | ND                   | bla <sub>APC-3</sub>    | bla <sub>OXA-9</sub> , bla <sub>TEM-1</sub> , bla <sub>SRT-2</sub> , bla <sub>OXA-2</sub>                        | aadA, aph(3)-Ib, aph(6)-Ia, sul2, aac(6)-Ib, sul1, aadA11, ant(2'')-Ia, aac(6)-Ic, dfrB3                                | 8                        | >128/2 | >16 | 6/4  | >4/76 | >8  | >8  | >2  | 4   | 4   | 4   | >16 | >16 | >32    | 0.5    | >4     | >2    | >8   | >8     | >16/25 | >16/25 |        |
| 2           | <i>E. coli</i>          | YDC134   | 131                  | bla <sub>APC-3</sub>    | bla <sub>TEM-1</sub>                                                                                             | aph(3)-Ib, aph(6)-Ia, sul2, dfrA14                                                                                      | <4                       | >128/2 | >16 | 6/4  | >4/76 | <1  | <1  | >2  | >8  | 8   | <2  | 4   | >16 | 8      | >16/25 | 0.5    | 1     | <1   | <1     | >16/25 | >16/25 |        |
| 3           | <i>E. coli</i>          | YDC334   | 131                  | bla <sub>APC-3</sub>    | bla <sub>TEM-1</sub> , bla <sub>OXA-9</sub>                                                                      | aadA, aadA5, aph(3)-Ib, aph(6)-Ia, mphA/mrx, sul1, sul2, aac(6)-Ib, dfrA17                                              | <4                       | >128/2 | >16 | 6/4  | >4/76 | <1  | <1  | >2  | >8  | 8   | <2  | 8   | >16 | 8      | >16/25 | 0.5    | 1     | <1   | <1     | >16/25 | >16/25 |        |
| 4           | <i>E. coli</i>          | YDC337   | 2521                 | bla <sub>APC-3</sub>    | bla <sub>TEM-1</sub> , bla <sub>OXA-9</sub>                                                                      | aadA, sul1, qnrA1, aac(6)-Ib, ant(2'')-Ia, dfrA14                                                                       | <4                       | >128/2 | >16 | 3/2  | >4/76 | <1  | <1  | 0.5 | <1  | <2  | <2  | 16  | 4   | >16    | >16    | >32    | 0.5   | >4   | >2     | >8     | >16/25 |        |
| 4           | <i>E. asburiae</i>      | YDC337-2 | ND                   | bla <sub>APC-3</sub>    | bla <sub>OXA-9</sub> , bla <sub>TEM-1</sub> , bla <sub>SHV-7</sub>                                               | aadA, sul1, qnrA1, ant(2'')-Ia, aac(6)-Ib, cat, fosA2, dfrA25                                                           | <4                       | >128/2 | >16 | >6/4 | >4/76 | >8  | >8  | >2  | >8  | 4   | 4   | >16 | >16 | >32    | 0.5    | >4     | >2    | >8   | >8     | >16/25 | >16/25 |        |
| 4           | <i>K. michiganensis</i> | YDC358   | ND                   | bla <sub>APC-3</sub>    | bla <sub>OXA-9</sub> , bla <sub>TEM-1</sub> , bla <sub>ACT-37</sub> , bla <sub>SHV-206</sub>                     | aadA, aph(3)-Ia, sul1, aac(6)-Ib, ant(2'')-Ia, dfrA14, fosA5                                                            | <4                       | >128/2 | >16 | 3/2  | >4/76 | <1  | <1  | >2  | 4   | 4   | 4   | >16 | >16 | >32    | 0.5    | >4     | >2    | >8   | >8     | >16/25 | >16/25 |        |
| 6           | <i>E. coli</i>          | YDC345   | 131                  | bla <sub>APC-3</sub>    | bla <sub>TEM-1</sub> , bla <sub>OXA-9</sub>                                                                      | aadA5, sul1, catB3, aac(6)-Ib-cr, dfrA14, dfrA17                                                                        | 8                        | >128/2 | >16 | >6/4 | >4/76 | <1  | >8  | >2  | >8  | <2  | <2  | 2   | 4   | >16    | >16    | >32    | 0.5   | >4   | >2     | >8     | >16/25 |        |
| 7           | <i>E. coli</i>          | YDC354   | 131                  | bla <sub>APC-3</sub>    | bla <sub>TEM-1</sub> , bla <sub>OXA-9</sub>                                                                      | aadA, aadA5, aph(3)-Ib, aph(6)-Ia, mphA/mrx, sul1, sul2, aac(6)-Ib, dfrA17                                              | <4                       | >128/2 | >16 | >6/4 | >4/76 | <1  | <1  | >2  | >8  | 8   | <2  | 8   | 8   | >16    | >16    | >32    | 0.5   | >4   | >2     | >8     | >16/25 |        |
| 8           | <i>E. coli</i>          | YD439    | 131                  | bla <sub>APC-3</sub>    | bla <sub>TEM-1</sub> , bla <sub>OXA-9</sub>                                                                      | aadA, aac(6)-Ib, dfrA14                                                                                                 | <4                       | >128/2 | >16 | >6/4 | >4/76 | <1  | <1  | >2  | >8  | <2  | <2  | 4   | 16  | 8      | >16/25 | 1      | 0.5   | <1   | <1     | >16/25 | >16/25 |        |
| 9           | <i>E. coli</i>          | YD509    | 372                  | bla <sub>APC-3</sub>    | bla <sub>TEM-1</sub>                                                                                             | aadA, sat-1, dfrA25, cat                                                                                                | <4                       | >128/2 | >16 | 3/2  | >4/76 | <1  | <1  | >2  | >8  | 8   | <2  | 8   | 8   | >16    | >16    | >32    | 0.5   | >4   | >2     | >8     | >16/25 |        |
| 9           | <i>S. marcescens</i>    | YD509-2  | ND                   | bla <sub>APC-3</sub>    | bla <sub>OXA-2</sub> , bla <sub>OXA-9</sub> , bla <sub>TEM-1</sub> , bla <sub>SHV-7</sub> , bla <sub>SRT-2</sub> | aadA, aadA11, aph(3)-Ib, aph(6)-Ia, sul1, sul2, aac(6)-Ib, ant(2'')-Ia, aac(6)-Ic, dfrB3                                | <4                       | >128/2 | >16 | >6/4 | >4/76 | >8  | >8  | >2  | >8  | 4   | 4   | >16 | 16  | 0.5    | 1      | 1      | 2     | <1   | >16/25 | >16/25 |        |        |
| 10          | <i>E. coli</i>          | YDC419   | 131                  | bla <sub>APC-3</sub>    | bla <sub>TEM-1</sub> , bla <sub>OXA-9</sub>                                                                      | aac(3)-IIa, aadA5, aph(3)-Ib, aph(6)-Ia, mphA/mrx, sul1, sul2, aac(6)-Ib, dfrA17                                        | <4                       | >128/2 | >16 | 6/4  | >4/76 | >8  | 8   | >2  | 8   | 8   | <2  | 2   | >16 | 0.5    | 0.25   | 0.5    | 0.25  | <1   | <1     | >16/25 | >16/25 |        |
| 11          | <i>E. coli</i>          | YDC462   | 131                  | bla <sub>APC-3</sub>    | bla <sub>TEM-1</sub>                                                                                             | aadA5, aph(3)-Ib, aph(6)-Ia, mphA/mrx, sul1, sul2, dfrA17                                                               | <4                       | >128/2 | >16 | >6/4 | >4/76 | <1  | <1  | >2  | >8  | 8   | <2  | 8   | >16 | 16     | >16/25 | 1      | 0.5   | <1   | <1     | >16/25 | >16/25 |        |
| 12          | <i>E. coli</i>          | YD648    | 2521                 | bla <sub>APC-3</sub>    | bla <sub>OXA-9</sub> , bla <sub>TEM-1</sub> , bla <sub>SHV-7</sub>                                               | aadA, sul1, qnrA1, aac(6)-Ib, ant(2'')-Ia, dfrA14                                                                       | <4                       | >128/2 | >16 | 3/2  | >4/76 | <1  | 2   | >2  | >8  | <2  | <2  | <1  | 2   | >16    | >16    | >32    | 0.5   | >4   | >2     | >8     | >16/25 |        |
| 12          | <i>K. pneumoniae</i>    | YD648-2  | 258                  | bla <sub>APC-3</sub>    | bla <sub>TEM-1</sub> , bla <sub>SHV-160</sub> , bla <sub>OXA-9</sub>                                             | aadA2, mphA/mrx, sul1, catI, aac(6)-Ib, dfrA12, fosA5                                                                   | >32                      | >128/2 | >16 | >6/4 | >4/76 | 4   | >8  | >2  | >8  | 4   | 4   | >16 | >16 | >32    | 0.5    | >4     | >2    | >8   | >8     | >16/25 | >16/25 |        |
| 13          | <i>E. coli</i>          | YD626    | 648                  | bla <sub>APC-2</sub>    | bla <sub>TEM-1</sub> , bla <sub>SHV-160</sub> , bla <sub>AP-1</sub>                                              | qnrS1, dfrA14                                                                                                           | <4                       | >128/2 | >16 | >6/4 | >4/76 | <1  | <1  | >2  | >8  | <2  | 2   | 4   | >16 | 16     | >16/25 | 4      | 1     | <1   | 2      | >16/25 | >16/25 |        |
| 13          | <i>K. varicola</i>      | YD626-2  | ND                   | bla <sub>APC-2</sub>    | bla <sub>TEM-1</sub> , bla <sub>SHV-160</sub> , bla <sub>AP-1</sub> , bla <sub>EN-2</sub>                        | qnrS1, fosA5                                                                                                            | <4                       | >128/2 | >16 | >6/4 | >4/76 | <1  | 2   | >2  | >8  | 4   | <2  | 4   | >16 | 16     | >16/25 | 4      | 1     | <1   | 2      | >16/25 | >16/25 |        |
| 14          | <i>E. coli</i>          | YD649    | 5743                 | bla <sub>APC-3</sub>    | bla <sub>OXA-9</sub> , bla <sub>TEM-1</sub> , bla <sub>SHV-7</sub>                                               | aadA, sul1, qnrA1, aac(6)-Ib, ant(2'')-Ia, dfrA14                                                                       | <4                       | >128/2 | >16 | 3/2  | >4/76 | >8  | >8  | 1   | <1  | 4   | 4   | <2  | 16  | 4      | >16/25 | >0.25  | >0.12 | <1   | <1     | >16/25 | >16/25 |        |
| 14          | <i>E. hormaechei</i>    | YDC498   | ND                   | bla <sub>APC-3</sub>    | bla <sub>OXA-9</sub> , bla <sub>ACT-37</sub> , bla <sub>SHV-7</sub> , bla <sub>TEM-1</sub>                       | aadA, sul1, qnrA1, aac(6)-Ib, ant(2'')-Ia, cat                                                                          | <4                       | >128/2 | >16 | 3/2  | 2/38  | >8  | >8  | 2   | 2   | <2  | <2  | 4   | >16 | 16     | >16/25 | 1      | 0.5   | <1   | <1     | >16/25 | >16/25 |        |
| 14          | <i>E. hormaechei</i>    | YDC518   | ND                   | bla <sub>APC-3</sub>    | bla <sub>OXA-9</sub> , bla <sub>ACT-37</sub> , bla <sub>SHV-7</sub> , bla <sub>TEM-1</sub>                       | aadA, sul1, qnrA1, aac(6)-Ib, ant(2'')-Ia, cat                                                                          | 16                       | >128/2 | >16 | 3/2  | 2/38  | >8  | >8  | >2  | 8   | 4   | 4   | >16 | 32  | >16/25 | 0.5    | 1      | <1    | <1   | >16/25 | >16/25 |        |        |
| 15          | <i>E. coli</i>          | YD673    | 131                  | bla <sub>APC-2</sub>    | bla <sub>TEM-1</sub> , bla <sub>OXA-9</sub>                                                                      | aac(3)-IIa, aadA5, aph(3)-Ib, aph(6)-Ia, mphA/mrx, sul1, sul2, aac(6)-Ib, dfrA14, dfrA17                                | <4                       | >128/2 | >16 | 3/2  | >4/76 | >8  | 8   | >2  | 8   | 8   | <2  | <2  | 4   | 2      | >16/25 | 0.5    | 0.25  | <1   | <1     | >16/25 | >16/25 |        |
| 15          | <i>K. pneumoniae</i>    | YDC465   | ND                   | bla <sub>APC-3</sub>    | bla <sub>OXA-9</sub> , bla <sub>TEM-11</sub> , bla <sub>TEM-1</sub>                                              | aadA, aph(3)-Ib, aph(6)-Ia, sul2, aac(6)-Ib, fosA5                                                                      | 32                       | >128/2 | >16 | 3/2  | >4/76 | <1  | >8  | >2  | >8  | <2  | <2  | 16  | >16 | >32    | >16/25 | >4     | >2    | 8    | >8     | >16/25 | >16/25 |        |
| 16          | <i>E. coli</i>          | YD705    | 131                  | bla <sub>APC-2</sub>    | bla <sub>TEM-206</sub> , bla <sub>OXA-9</sub>                                                                    | aac(3)-IIa, aadA5, aph(3)-Ib, aph(6)-Ia, mphA/mrx, sul1, sul2, dfrA17                                                   | <4                       | >128/2 | >16 | 3/2  | >4/76 | >8  | >8  | >2  | >8  | 8   | <2  | 4   | 4   | >16    | >16    | >32    | 0.5   | 0.25 | <1     | <1     | >16/25 | >16/25 |
| 17          | <i>E. coli</i>          | YD736    | 131                  | bla <sub>APC-2</sub>    | bla <sub>TEM-12</sub> , bla <sub>OXA-9</sub>                                                                     | aadA, aac(6)-Ib, dfrA14                                                                                                 | <4                       | >128/2 | >16 | >6/4 | >4/76 | <1  | <1  | >2  | >8  | <2  | <2  | 8   | 16  | 16     | >16/25 | 2      | 1     | <1   | 2      | >16/25 | >16/25 |        |
| 18          | <i>E. coli</i>          | YD748    | 131                  | bla <sub>APC-2</sub>    | bla <sub>TEM-12</sub> , bla <sub>OXA-9</sub>                                                                     | aac(3)-IIa, aadA5, aph(3)-Ib, aph(6)-Ia, mphA/mrx, sul1, sul2, dfrA17                                                   | <4                       | >128/2 | 8   | 16/4 | >4/76 | >8  | 8   | >2  | >8  | 8   | <2  | <2  | <1  | <1     | >16/25 | >0.25  | >0.12 | <1   | <1     | >16/25 | >16/25 |        |
| 19          | <i>E. coli</i>          | YD749    | 131                  | bla <sub>APC-3</sub>    | bla <sub>TEM-14</sub> , bla <sub>OXA-9</sub>                                                                     | aadA, aadA5, aph(3)-Ib, aph(6)-Ia, mphA/mrx, sul1, sul2, aac(6)-Ib, dfrA14, dfrA17                                      | <4                       | >128/2 | >16 | >6/4 | >4/76 | <1  | <1  | >2  | 8   | 16  | <2  | 16  | >16 | >16    | >32    | >16/25 | 4     | 2    | 2      | 2      | >16/25 |        |
| 21          | <i>E. coli</i>          | YDC593   | 131                  | bla <sub>APC-2</sub>    | bla <sub>TEM-1</sub> , bla <sub>OXA-9</sub>                                                                      | aac(3)-IIa, aadA5, sul1, aadA24, dfrA14, dfrA17, aac(6)-IId                                                             | <4                       | >128/2 | 16  | 3/2  | >4/76 | >8  | 8   | >2  | >8  | <2  | <2  | 8   | 2   | >16/25 | 0.5    | 0.25   | 0.5   | <1   | <1     | >16/25 | >16/25 |        |
| 22          | <i>E. coli</i>          | YDC595   | 95 (95)              | bla <sub>APC-2</sub>    | bla <sub>TEM-1</sub>                                                                                             | none                                                                                                                    | <4                       | >128/2 | >16 | >6/4 | >4/76 | <1  | <1  | >2  | >8  | 8   | <2  | 8   | 16  | >16/25 | 4      | 1      | 2     | 2    | 0.5    | >16/25 |        |        |
| 23          | <i>E. coli</i>          | YD761    | 69 (69)              | bla <sub>APC-3</sub>    | bla <sub>TEM-1</sub> , bla <sub>SHV-160</sub>                                                                    | aac(6)-IId                                                                                                              | <4                       | 128/2  | >16 | >8/4 | >4/76 | <1  | <1  | >2  | >8  | <2  | <2  | 8   | 4   | >16/25 | >0.25  | >0.12  | <1    | <1   | >16/25 | >16/25 |        |        |
| 24          | <i>E. coli</i>          | YD762    | 131                  | bla <sub>APC-3</sub>    | bla <sub>TEM-1</sub> , bla <sub>OXA-9</sub>                                                                      | aadA, aph(3)-Ib, aph(6)-Ia, sul1, sul2, aac(6)-Ib, dfrA14                                                               | 16                       | >128/2 | >16 | >6/4 | >4/76 | >8  | >8  | >2  | >8  | <2  | <2  | 4   | >16 | 8      | >16/25 | 0.5    | 0.5   | 2    | <1     | >16/25 | >16/25 |        |
| 24          | <i>K. pneumoniae</i>    | YD762-2  | 258                  | bla <sub>APC-2</sub>    | bla <sub>TEM-1</sub> , bla <sub>SHV-160</sub> , bla <sub>OXA-9</sub>                                             | aac(3)-IV, aadA, aadA2, aph(4)-Ia, sul3, aac(6)-Ib, fosA5                                                               | 16                       | >128/2 | >16 | >6/4 | >4/76 | >8  | >8  | >2  | >8  | <2  | <2  | 4   | >16 | 16     | >16/25 | 2      | 1     | <1   | <1     | >16/25 | >16/25 |        |
| 24          | <i>K. pneumoniae</i>    | YD762-3  | 258                  | bla <sub>APC-2</sub>    | bla <sub>TEM-1</sub> , bla <sub>SHV-160</sub> , bla <sub>OXA-9</sub>                                             | aadA, aadA2, aph(4)-Ia, sul3, aac(6)-Ib, fosA5                                                                          | 32                       | >128/2 | >16 | >6/4 | >4/76 | >8  | >8  | >2  | >8  | <2  | <2  | 8   | >16 | 32     | >16/25 | >4     | 1     | 2    | 4      | >16/25 | >16/25 |        |
| 26          | <i>E. coli</i>          | YDC717   | 131                  | bla <sub>APC-2</sub>    | bla <sub>TEM-1</sub> , bla <sub>CTX-M-37</sub> , bla <sub>OXA-9</sub>                                            | aadA5, aph(3)-Ib, aph(6)-Ia, mphA/mrx, sul1, sul2, aac(6)-Ib, dfrA17                                                    | <4                       | >128/2 | >16 | 3/2  | >4/76 | <1  | <1  | >2  | >8  | <2  | <2  | 8   | 8   | 8      | >16/25 | 4      | 1     | 2    | 2      | 0.5    | >16/25 |        |
| 27          | <i>E. coli</i>          | YDC735   | 131                  | bla <sub>APC-2</sub>    | bla <sub>TEM-1</sub> , bla <sub>OXA-9</sub>                                                                      | aac(3)-IIa, aadA5, aph(3)-Ib, aph(6)-Ia, mphA/mrx, sul1, sul2, aadA24, dfrA17                                           | <4                       | >128/2 | >16 | >6/4 | >4/76 | >8  | 8   | >   |     |     |     |     |     |        |        |        |       |      |        |        |        |        |

**Table S3.** *bla*<sub>KPC</sub>-containing *E. coli* genomes analyzed in this study

| Strain ID | Molecular Serotype <sup>a</sup> | ST (CC) <sup>b</sup> | <i>bla</i> <sub>KPC</sub> Gene | GenBank Accession No. |
|-----------|---------------------------------|----------------------|--------------------------------|-----------------------|
| YDC107    | O102:H6                         | 964                  | <i>bla</i> <sub>KPC-3</sub>    | CP025707-CP025713     |
| YDC134    | O25:H4                          | 131                  | <i>bla</i> <sub>KPC-3</sub>    | PGIB00000000          |
| YDC304    | O25:H4                          | 131                  | <i>bla</i> <sub>KPC-2</sub>    | PGIA00000000          |
| YDC337    | O147:H7                         | 2521                 | <i>bla</i> <sub>KPC-3</sub>    | PGHZ00000000          |
| YDC345    | O25:H4                          | 131                  | <i>bla</i> <sub>KPC-2</sub>    | PGHY00000000          |
| YDC354    | O25:H4                          | 131                  | <i>bla</i> <sub>KPC-2</sub>    | PGHX00000000          |
| YD439     | O25:H4                          | 131                  | <i>bla</i> <sub>KPC-3</sub>    | PGHW00000000          |
| YD509     | O18ac:H31                       | 372                  | <i>bla</i> <sub>KPC-3</sub>    | PGHV00000000          |
| YDC419    | O25:H4                          | 131                  | <i>bla</i> <sub>KPC-2</sub>    | PGHT00000000          |
| YDC462    | O25:H4                          | 131                  | <i>bla</i> <sub>KPC-3</sub>    | PGHS00000000          |
| YD648     | O147:H7                         | 2521                 | <i>bla</i> <sub>KPC-3</sub>    | PGHR00000000          |
| YD626     | O1:H6                           | 648                  | <i>bla</i> <sub>KPC-2</sub>    | PGHP00000000          |
| YD649     | ONT:H49                         | 5743                 | <i>bla</i> <sub>KPC-3</sub>    | PGHO00000000          |
| YD673     | O25:H4                          | 131                  | <i>bla</i> <sub>KPC-2</sub>    | PGHN00000000          |
| YD705     | O25:H4                          | 131                  | <i>bla</i> <sub>KPC-2</sub>    | PGHL00000000          |
| YD736     | O25:H4                          | 131                  | <i>bla</i> <sub>KPC-2</sub>    | PGHK00000000          |
| YD748     | O25:H4                          | 131                  | <i>bla</i> <sub>KPC-2</sub>    | PGHJ00000000          |
| YD749     | O25:H4                          | 131                  | <i>bla</i> <sub>KPC-3</sub>    | PGHI00000000          |
| YDC593    | O25:H4                          | 131                  | <i>bla</i> <sub>KPC-2</sub>    | PGHH00000000          |
| YDC595    | O50/O2:H7                       | 95 (95)              | <i>bla</i> <sub>KPC-2</sub>    | PGHG00000000          |
| YD761     | O15:H18                         | 69 (69)              | <i>bla</i> <sub>KPC-3</sub>    | PGHF00000000          |
| YD762     | O16:H5                          | 131                  | <i>bla</i> <sub>KPC-3</sub>    | PGHE00000000          |
| YDC717    | O25:H4                          | 131                  | <i>bla</i> <sub>KPC-2</sub>    | PGHB00000000          |
| YDC735    | O25:H4                          | 131                  | <i>bla</i> <sub>KPC-2</sub>    | PGHA00000000          |
| YDC736-1  | O75:H5                          | 1858                 | <i>bla</i> <sub>KPC-2</sub>    | PGGZ00000000          |
| YD789     | O25:H4                          | 131                  | <i>bla</i> <sub>KPC-2</sub>    | PGGY00000000          |
| 1326F     | O1:H6                           | 648                  | Contains deletions             | GCA_001611725.1       |
| BIDMC102  | O102:H6                         | 405 (405)            | <i>bla</i> <sub>KPC-2</sub>    | GCA_001030515.1       |
| BIDMC104  | ONT:H8                          | 448 (448)            | <i>bla</i> <sub>KPC-2</sub>    | GCA_001030555.1       |
| BIDMC15   | O1:H6                           | 648                  | <i>bla</i> <sub>KPC-2</sub>    | GCA_000522245.1       |
| BIDMC17A  | O1:H6                           | 648                  | <i>bla</i> <sub>KPC-2</sub>    | GCA_000522225.1       |
| BIDMC17B  | O1:H6                           | 648                  | <i>bla</i> <sub>KPC-2</sub>    | GCA_000522205.1       |
| BIDMC19A  | O1:H6                           | 648                  | <i>bla</i> <sub>KPC-2</sub>    | GCA_000522185.1       |
| BIDMC19B  | O1:H6                           | 648                  | <i>bla</i> <sub>KPC-2</sub>    | GCA_000522165.1       |
| BIDMC19C  | O1:H6                           | 648                  | <i>bla</i> <sub>KPC-2</sub>    | GCA_000474825.1       |
| BIDMC20A  | O25:H4                          | 131                  | <i>bla</i> <sub>KPC-3</sub>    | GCA_000522145.1       |
| BIDMC20B  | O25:H4                          | 131                  | <i>bla</i> <sub>KPC-3</sub>    | GCA_000522125.1       |
| BIDMC2B   | O1:H6                           | 648                  | <i>bla</i> <sub>KPC-2</sub>    | GCA_000522305.1       |
| BIDMC3    | O1:H6                           | 648                  | <i>bla</i> <sub>KPC-2</sub>    | GCA_000522285.1       |
| BIDMC43a  | O1:H6                           | 648                  | <i>bla</i> <sub>KPC-2</sub>    | GCA_000522105.1       |
| BIDMC43b  | O1:H6                           | 648                  | <i>bla</i> <sub>KPC-2</sub>    | GCA_000522085.1       |
| BIDMC58   | O25:H4                          | 131                  | <i>bla</i> <sub>KPC-3</sub>    | GCA_000692375.1       |
| BIDMC6    | O1:H6                           | 648                  | <i>bla</i> <sub>KPC-2</sub>    | GCA_000522405.1       |
| BIDMC62   | O25:H4                          | 131                  | <i>bla</i> <sub>KPC-3</sub>    | GCA_000692415.1       |
| BIDMC64   | O25:H4                          | 131                  | <i>bla</i> <sub>KPC-3</sub>    | GCA_000692455.1       |
| BIDMC82   | O1:H6                           | 648                  | <i>bla</i> <sub>KPC-2</sub>    | GCA_000633675.1       |
| BIDMC9    | O1:H6                           | 648                  | <i>bla</i> <sub>KPC-2</sub>    | GCA_000522265.1       |
| BWH24     | O25:H4                          | 131                  | <i>bla</i> <sub>KPC-3</sub>    | GCA_000474845.1       |
| BWH34     | O25:H4                          | 131                  | <i>bla</i> <sub>KPC-3</sub>    | GCA_000522345.1       |
| ECONIH1   | O1:H6                           | 648                  | <i>bla</i> <sub>KPC-2</sub>    | GCA_000784925.1       |
| ECONIH2   | O6:H31                          | 127                  | <i>bla</i> <sub>KPC-3</sub>    | GCA_001675145.1       |
| MGH121    | O89:H9                          | 167 (10)             | <i>bla</i> <sub>KPC-3</sub>    | GCA_001030425.1       |
| MNCRE44   | O25:H4                          | 131                  | <i>bla</i> <sub>KPC-3</sub>    | GCA_000931565.1       |
| MNCRE45   | O25:H4                          | 131                  | <i>bla</i> <sub>KPC-3</sub>    | GCA_000952385.1       |
| MNCRE46   | O25:H4                          | 131                  | <i>bla</i> <sub>KPC-3</sub>    | GCA_000952305.1       |
| MRSN10204 | O83:H1                          | 2554                 | <i>bla</i> <sub>KPC-3</sub>    | GCA_000982035.1       |

<sup>a</sup>Molecular serotypes were predicted for each of the *E. coli* genome assemblies.

<sup>b</sup>Multilocus sequence typing (MLST) sequence types (STs) of *E. coli* and *K. pneumoniae* were determined by analysis of the genome assemblies. The clonal complex (CC) is in parentheses.

Table S4. Annotation of plasmid pYDC107\_184

| CDS | Locus       | Gene                       | Predicted Protein Function                                                       | Start  | Stop   |
|-----|-------------|----------------------------|----------------------------------------------------------------------------------|--------|--------|
| 1   | YDC107_4930 | <i>repA</i>                | RepFIB replication protein A                                                     | 1      | 978    |
| 2   | YDC107_4931 |                            | phage integrase family protein                                                   | 2,003  | 1,263  |
| 3   | YDC107_4932 |                            | ribbon-helix-helix, CopG family transcriptional regulator                        | 2,917  | 2,735  |
| 4   | YDC107_4933 |                            | conserved hypothetical protein                                                   | 2,522  | 2,779  |
| 5   | YDC107_4934 |                            | putative membrane protein                                                        | 3,449  | 4,618  |
| 6   | YDC107_4935 |                            | hypothetical protein                                                             | 5,107  | 4,814  |
| 7   | YDC107_4936 |                            | plasmid stabilisation system family protein                                      | 5,488  | 5,213  |
| 8   | YDC107_4937 |                            | ribbon-helix-helix, CopG family transcriptional regulator                        | 5,766  | 5,488  |
| 9   | YDC107_4938 |                            | putative transcriptional regulator                                               | 6,377  | 7,129  |
| 10  | YDC107_4939 | <i>kdgT</i>                | 2-keto-3-deoxygluconate transporter                                              | 8,140  | 7,175  |
| 11  | YDC107_4940 |                            | L-PSP putative endoribonuclease                                                  | 8,553  | 8,173  |
| 12  | YDC107_4941 |                            | dihydrodipicolinate synthetase family protein                                    | 9,468  | 8,578  |
| 13  | YDC107_4942 |                            | putative oxidoreductase                                                          | 10,082 | 10,309 |
| 14  | YDC107_4943 |                            | putative sugar transport protein                                                 | 10,452 | 11,318 |
| 15  | YDC107_4944 |                            | putative sugar transport protein                                                 | 11,308 | 12,195 |
| 16  | YDC107_4945 | <i>cpdA</i>                | 3',5'-cyclic adenosine monophosphate phosphodiesterase CpdA                      | 12,206 | 13,030 |
| 17  | YDC107_4946 | <i>ugpC</i>                | sn-glycerol-3-phosphate import-ATP-binding protein UgpC                          | 13,036 | 14,109 |
| 18  | YDC107_4947 |                            | bacterial extracellular solute-binding family protein                            | 14,102 | 15,412 |
| 19  | YDC107_4948 |                            | transposase                                                                      | 15,836 | 15,471 |
| 20  | YDC107_4949 |                            | transposase                                                                      | 16,029 | 15,856 |
| 21  | YDC107_4950 |                            | integrase core domain protein                                                    | 16,497 | 16,111 |
| 22  | YDC107_4951 |                            | HTH-like domain protein                                                          | 16,999 | 16,541 |
| 23  | YDC107_4952 |                            | transposase IS66 family protein                                                  | 17,332 | 18,036 |
| 24  | YDC107_4953 |                            | histidine phosphatase protein                                                    | 18,624 | 18,070 |
| 25  | YDC107_4954 |                            | hypothetical protein                                                             | 19,231 | 18,746 |
| 26  | YDC107_4955 |                            | thioredoxin-like family protein                                                  | 19,741 | 19,256 |
| 27  | YDC107_4956 |                            | ABC transporter family protein                                                   | 20,423 | 19,728 |
| 28  | YDC107_4957 |                            | ABC transporter permease                                                         | 21,540 | 20,428 |
| 29  | YDC107_4958 |                            | ABC transporter permease                                                         | 22,831 | 21,548 |
| 30  | YDC107_4959 |                            | conserved hypothetical protein                                                   | 24,213 | 22,834 |
| 31  | YDC107_4960 |                            | periplasmic protein-probably involved in high-affinity Fe2+ transport            | 24,838 | 24,317 |
| 32  | YDC107_4961 |                            | iron permease FTR1 family protein                                                | 26,801 | 24,885 |
| 33  | YDC107_4962 | <i>nqrC</i>                | ubiquinone oxidoreductase, Na(+)-translocating, C subunit                        | 27,879 | 27,118 |
| 34  | YDC107_4963 |                            | thioredoxin-like family protein                                                  | 28,622 | 28,116 |
| 35  | YDC107_4964 |                            | DSBA-like thioredoxin domain protein                                             | 28,770 | 28,612 |
| 36  | YDC107_4965 |                            | hypothetical protein                                                             | 29,481 | 29,266 |
| 37  | YDC107_4966 |                            | putative transposase                                                             | 29,553 | 29,930 |
| 38  | YDC107_4967 |                            | transposase DDE domain protein                                                   | 30,395 | 31,108 |
| 39  | YDC107_4968 | <i>tetD</i>                | transposon Tn10 TetD protein                                                     | 31,534 | 31,118 |
| 40  | YDC107_4969 | <i>tetC</i>                | transposon Tn10 TetC protein                                                     | 31,622 | 32,215 |
| 41  | YDC107_4970 | <i>tetA</i>                | tetracycline resistance protein, class B                                         | 33,533 | 32,328 |
| 42  | YDC107_4971 |                            | transcriptional regulator                                                        | 34,902 | 34,216 |
| 43  | YDC107_4972 | <i>tetR</i>                | tetracycline repressor protein TetR                                              | 33,615 | 34,238 |
| 44  | YDC107_4973 |                            | amino acid binding protein                                                       | 35,296 | 34,910 |
| 45  | YDC107_4974 |                            | putative antibiotic biosynthesis monooxygenase                                   | 35,462 | 35,289 |
| 46  | YDC107_4975 |                            | putative transposase                                                             | 35,926 | 35,549 |
| 47  | YDC107_4976 |                            | hypothetical protein                                                             | 35,998 | 36,213 |
| 48  | YDC107_4977 | <i>aadA5</i>               | nucleotidyltransferase domain protein                                            | 36,765 | 37,553 |
| 49  | YDC107_4978 | <i>qacEΔ1</i>              | small multidrug resistance family protein                                        | 37,759 | 38,106 |
| 50  | YDC107_4979 | <i>sul1</i>                | dihydropterolate synthase                                                        | 38,100 | 38,939 |
| 51  | YDC107_4980 |                            | hypothetical protein                                                             | 39,067 | 39,270 |
| 52  | YDC107_4981 | <i>chrA</i>                | chromate transporter, chromate ion transporter family protein                    | 39,426 | 40,631 |
| 53  | YDC107_4982 |                            | transcriptional regulator                                                        | 40,642 | 40,947 |
| 54  | YDC107_4983 | <i>tnpA</i>                | transposase IS66 family protein                                                  | 41,174 | 41,938 |
| 55  | YDC107_4984 | <i>mphR(A)</i>             | erythromycin resistance repressor protein MphR(A)                                | 43,015 | 42,431 |
| 56  | YDC107_4985 | <i>mrx</i>                 | major facilitator superfamily protein Mrx                                        | 44,253 | 43,015 |
| 57  | YDC107_4986 | <i>mph(A)</i>              | phosphotransferase enzyme family protein Mph(A)                                  | 45,155 | 44,250 |
| 58  | YDC107_4987 |                            | transposase IS66 family protein                                                  | 45,981 | 45,277 |
| 59  | YDC107_4988 | <i>ermL</i>                | 23S rRNA methylase leader peptide family protein                                 | 46,116 | 46,211 |
| 60  | YDC107_4989 | <i>ermB</i>                | rRNA adenine N-6-methyltransferase                                               | 46,337 | 47,074 |
| 61  | YDC107_4990 |                            | putative ermAM-like protein                                                      | 47,079 | 47,189 |
| 62  | YDC107_4991 |                            | conserved hypothetical protein                                                   | 47,704 | 48,153 |
| 63  | YDC107_4992 | <i>groEL</i>               | GroEL domain protein                                                             | 48,114 | 48,455 |
| 64  | YDC107_4993 |                            | transposase family protein                                                       | 48,682 | 50,214 |
| 65  | YDC107_4994 |                            | transposase IS66 family protein                                                  | 51,241 | 50,537 |
| 66  | YDC107_4995 |                            | conserved hypothetical protein                                                   | 52,405 | 51,278 |
| 67  | YDC107_4996 |                            | putative membrane protein                                                        | 52,683 | 52,456 |
| 68  | YDC107_4997 |                            | putative ATPase protein                                                          | 53,922 | 53,380 |
| 69  | YDC107_4998 | <i>aac(3)-IIa</i>          | aminoglycoside 3-N-acetyltransferase family protein AAC(3)-IIa                   | 54,795 | 53,935 |
| 70  | YDC107_4999 |                            | transposase IS66 family protein                                                  | 55,208 | 55,912 |
| 71  | YDC107_5000 |                            | resolvase, N terminal domain protein                                             | 56,019 | 56,351 |
| 72  | YDC107_5001 | <i>bla<sub>TEM-1</sub></i> | beta-lactamase TEM                                                               | 56,534 | 57,394 |
| 73  | YDC107_5002 | <i>aph(6)-Ic</i>           | aminoglycoside/hydroxyurea antibiotic resistance kinase family protein APH(6)-Ic | 58,461 | 57,625 |
| 74  | YDC107_5003 | <i>aph(3'')-Ib</i>         | phosphotransferase enzyme family protein APH(3'')-Ib                             | 59,264 | 58,461 |
| 75  | YDC107_5004 | <i>sul2</i>                | dihydropterolate synthase                                                        | 60,140 | 59,325 |
| 76  | YDC107_5005 |                            | integrase                                                                        | 60,470 | 60,646 |
| 77  | YDC107_5006 |                            | transposase family protein                                                       | 61,832 | 60,828 |
| 78  | YDC107_5007 |                            | transposase                                                                      | 64,877 | 61,911 |
| 79  | YDC107_5008 |                            | resolvase, N terminal domain protein                                             | 65,134 | 64,880 |
| 80  | YDC107_5009 |                            | transposase IS66 family protein                                                  | 65,952 | 65,248 |
| 81  | YDC107_5010 | <i>dfrA14</i>              | dihydrofolate reductase type 1                                                   | 66,495 | 66,022 |
| 82  | YDC107_5011 |                            | integrase                                                                        | 66,651 | 67,664 |
| 83  | YDC107_5012 |                            | transposase IS66 family protein                                                  | 68,816 | 68,112 |
| 84  | YDC107_5013 |                            | transposase                                                                      | 68,867 | 70,396 |
| 85  | YDC107_5014 |                            | divergent AAA domain protein                                                     | 72,383 | 70,611 |
| 86  | YDC107_5015 | <i>pemK</i>                | mRNA interferase PemK                                                            | 73,000 | 72,668 |
| 87  | YDC107_5016 | <i>pemI</i>                | antitoxin PemI                                                                   | 73,259 | 73,002 |
| 88  | YDC107_5017 |                            | CAAX protease self-immunity family protein                                       | 74,005 | 73,352 |
| 89  | YDC107_5018 | <i>repA</i>                | IncFII family plasmid replication initiator RepA                                 | 75,801 | 74,944 |
| 90  | YDC107_5019 | <i>repB</i>                | replication regulatory RepB family protein                                       | 76,361 | 76,104 |
| 91  | YDC107_5020 |                            | transposase family protein                                                       | 76,766 | 77,788 |
| 92  | YDC107_5021 |                            | putative membrane protein                                                        | 78,260 | 78,613 |
| 93  | YDC107_5022 |                            | conserved hypothetical protein                                                   | 79,520 | 79,026 |
| 94  | YDC107_5023 |                            | putative transposase                                                             | 79,953 | 80,330 |
| 95  | YDC107_5024 |                            | conserved hypothetical protein                                                   | 81,337 | 80,813 |
| 96  | YDC107_5025 | <i>argR</i>                | arginine repressor ArgR                                                          | 82,233 | 81,757 |
| 97  | YDC107_5026 |                            | C4-dicarboxylate anaerobic carrier family protein                                | 83,720 | 82,317 |
| 98  | YDC107_5027 | <i>argF</i>                | ornithine carbamoyltransferase                                                   | 84,772 | 83,768 |
| 99  | YDC107_5028 | <i>arcC</i>                | carbamate kinase                                                                 | 85,768 | 84,857 |
| 100 | YDC107_5029 | <i>arcA</i>                | arginine deiminase                                                               | 86,999 | 85,779 |
| 101 | YDC107_5030 |                            | pre-toxin domain with VENN motif family protein                                  | 87,841 | 88,086 |
| 102 | YDC107_5031 | <i>repA</i>                | IncFII RepA family protein                                                       | 88,766 | 88,314 |
| 103 | YDC107_5032 | <i>repB</i>                | replication regulatory RepB family protein                                       | 89,326 | 89,069 |
| 104 | YDC107_5033 |                            | hok/gef family protein                                                           | 89,759 | 89,610 |
| 105 | YDC107_5034 |                            | conserved hypothetical protein                                                   | 90,185 | 90,003 |

|     |             |                                                                                              |         |         |
|-----|-------------|----------------------------------------------------------------------------------------------|---------|---------|
| 106 | YDC107_5035 | conserved hypothetical protein                                                               | 89,815  | 90,057  |
| 107 | YDC107_5036 | putative transposase                                                                         | 90,602  | 90,988  |
| 108 | YDC107_5037 | conserved hypothetical protein                                                               | 91,501  | 91,289  |
| 109 | YDC107_5038 | <i>finO</i> fertility inhibition protein                                                     | 92,194  | 91,634  |
| 110 | YDC107_5039 | <i>traX</i> type-F conjugative transfer system pilin acetylase TraX                          | 92,995  | 92,249  |
| 111 | YDC107_5040 | <i>tral</i> conjugative transfer relaxase protein Tral                                       | 98,285  | 93,015  |
| 112 | YDC107_5041 | <i>traD</i> type IV conjugative transfer system coupling protein TraD                        | 100,465 | 98,285  |
| 113 | YDC107_5042 | <i>traT</i> enterobacterial TraT complement resistance family protein                        | 101,448 | 100,717 |
| 114 | YDC107_5043 | <i>traS</i> putative TraS                                                                    | 101,972 | 101,517 |
| 115 | YDC107_5044 | <i>traG</i> TraG-like, N-terminal region family protein                                      | 104,794 | 101,969 |
| 116 | YDC107_5045 | <i>traH</i> conjugal transfer protein TraH                                                   | 106,164 | 104,791 |
| 117 | YDC107_5046 | <i>trbF</i> conjugal transfer protein TrbF                                                   | 106,543 | 106,151 |
| 118 | YDC107_5047 | <i>trbJ</i> conjugal transfer protein TrbJ                                                   | 106,810 | 106,586 |
| 119 | YDC107_5048 | <i>trbB</i> type-F conjugative transfer system pilin assembly thiol-disulfide isomerase TrbB | 107,354 | 106,800 |
| 120 | YDC107_5049 | <i>traQ</i> type-F conjugative transfer system pilin chaperone TraQ                          | 107,625 | 107,341 |
| 121 | YDC107_5050 | <i>trbA</i> conjugal transfer protein TrbA                                                   | 108,363 | 108,022 |
| 122 | YDC107_5051 | putative membrane protein                                                                    | 107,706 | 108,041 |
| 123 | YDC107_5052 | <i>traF</i> type-F conjugative transfer system pilin assembly protein TraF                   | 109,120 | 108,377 |
| 124 | YDC107_5053 | <i>trbE</i> conjugal transfer TrbE family protein                                            | 109,370 | 109,113 |
| 125 | YDC107_5054 | <i>traN</i> type-F conjugative transfer system mating-pair stabilization protein TraN        | 111,205 | 109,397 |
| 126 | YDC107_5055 | <i>trbC</i> type-F conjugative transfer system pilin assembly protein TrbC                   | 111,840 | 111,202 |
| 127 | YDC107_5056 | <i>traU</i> TraU family protein                                                              | 112,841 | 111,849 |
| 128 | YDC107_5057 | <i>traW</i> type-F conjugative transfer system protein TraW                                  | 113,470 | 112,838 |
| 129 | YDC107_5058 | <i>trbI</i> type-F conjugative transfer system protein TrbI                                  | 113,853 | 113,467 |
| 130 | YDC107_5059 | <i>traC</i> type-IV secretion system protein TraC                                            | 116,477 | 113,850 |
| 131 | YDC107_5060 | <i>traV</i> type IV conjugative transfer system protein TraV                                 | 117,508 | 116,993 |
| 132 | YDC107_5061 | <i>trbG</i> putative TrbG                                                                    | 117,756 | 117,505 |
| 133 | YDC107_5062 | <i>trbD</i> conjugal transfer protein TrbD                                                   | 117,910 | 117,749 |
| 134 | YDC107_5063 | <i>trbD</i> conjugal transfer protein TrbD                                                   | 118,069 | 117,932 |
| 135 | YDC107_5064 | <i>traP</i> TraP family protein                                                              | 118,646 | 118,056 |
| 136 | YDC107_5065 | <i>traB</i> conjugal transfer protein TraB                                                   | 120,063 | 118,636 |
| 137 | YDC107_5066 | <i>traK</i> type-F conjugative transfer system secretin TraK                                 | 120,791 | 120,063 |
| 138 | YDC107_5067 | <i>traE</i> type IV conjugative transfer system protein TraE                                 | 121,344 | 120,778 |
| 139 | YDC107_5068 | <i>traL</i> type IV conjugative transfer system protein TraL                                 | 121,677 | 121,366 |
| 140 | YDC107_5069 | <i>traA</i> type IV conjugative transfer system pilin TraA                                   | 122,057 | 121,692 |
| 141 | YDC107_5070 | <i>traY</i> TraY domain protein                                                              | 122,315 | 122,100 |
| 142 | YDC107_5071 | <i>traJ</i> putative protein TraJ                                                            | 123,098 | 122,451 |
| 143 | YDC107_5072 | <i>traM</i> relaxosome protein TraM                                                          | 123,672 | 123,289 |
| 144 | YDC107_5073 | lytic transglycosylase                                                                       | 124,105 | 124,614 |
| 145 | YDC107_5074 | conserved hypothetical protein                                                               | 124,695 | 124,862 |
| 146 | YDC107_5075 | conserved hypothetical protein                                                               | 125,731 | 124,910 |
| 147 | YDC107_5076 | <i>yubO</i> putative YubO protein                                                            | 126,137 | 125,850 |
| 148 | YDC107_5077 | conserved hypothetical protein                                                               | 126,368 | 126,162 |
| 149 | YDC107_5078 | putative plasmid maintenance protein                                                         | 127,252 | 127,040 |
| 150 | YDC107_5079 | ion channel family protein                                                                   | 129,251 | 128,628 |
| 151 | YDC107_5080 | putative transposase                                                                         | 129,644 | 129,267 |
| 152 | YDC107_5081 | hypothetical protein                                                                         | 130,367 | 130,188 |
| 153 | YDC107_5082 | putative glycoporin                                                                          | 131,761 | 130,367 |
| 154 | YDC107_5083 | sucrose-6-phosphate hydrolase family protein                                                 | 133,386 | 131,956 |
| 155 | YDC107_5084 | <i>rafA</i> H <sup>+</sup> symporter family protein                                          | 134,663 | 133,386 |
| 156 | YDC107_5085 | <i>rafR</i> alpha-galactosidase                                                              | 136,852 | 134,726 |
| 157 | YDC107_5086 | <i>rafR</i> HTH-type transcriptional regulator RafR                                          | 137,958 | 136,948 |
| 158 | YDC107_5087 | phage integrase family protein                                                               | 138,859 | 138,116 |
| 159 | YDC107_5088 | transposase family protein                                                                   | 138,965 | 139,330 |
| 160 | YDC107_5089 | transposase                                                                                  | 139,354 | 140,193 |
| 161 | YDC107_5090 | caspase domain protein                                                                       | 140,178 | 140,747 |
| 162 | YDC107_5091 | conserved hypothetical protein                                                               | 141,272 | 141,841 |
| 163 | YDC107_5092 | putative membrane protein                                                                    | 142,102 | 141,848 |
| 164 | YDC107_5093 | methyltransferase domain protein                                                             | 142,691 | 142,128 |
| 165 | YDC107_5094 | conserved hypothetical protein                                                               | 144,100 | 142,739 |
| 166 | YDC107_5095 | putative conserved predicted protein                                                         | 144,382 | 144,152 |
| 167 | YDC107_5096 | conserved hypothetical protein                                                               | 145,608 | 145,417 |
| 168 | YDC107_5097 | conserved hypothetical protein                                                               | 146,027 | 145,605 |
| 169 | YDC107_5098 | antirestriction family protein                                                               | 146,499 | 146,074 |
| 170 | YDC107_5099 | conserved hypothetical protein                                                               | 147,692 | 146,916 |
| 171 | YDC107_5100 | conserved hypothetical protein                                                               | 148,177 | 147,743 |
| 172 | YDC107_5101 | conserved hypothetical protein                                                               | 148,412 | 148,191 |
| 173 | YDC107_5102 | DNA methylase family protein                                                                 | 149,096 | 148,413 |
| 174 | YDC107_5103 | conserved hypothetical protein                                                               | 150,407 | 149,481 |
| 175 | YDC107_5104 | <i>sopB</i> plasmid partitioning protein SopB                                                | 152,221 | 151,250 |
| 176 | YDC107_5105 | <i>sopA</i> plasmid partitioning protein SopA                                                | 153,387 | 152,221 |
| 177 | YDC107_5106 | <i>repE</i> replication initiation protein RepE                                              | 154,730 | 153,975 |
| 178 | YDC107_5107 | resolvase                                                                                    | 156,310 | 155,504 |
| 179 | YDC107_5108 | <i>ccdB</i> toxin CcdB                                                                       | 156,616 | 156,311 |
| 180 | YDC107_5109 | <i>ccdA</i> antitoxin CcdA                                                                   | 156,836 | 156,618 |
| 181 | YDC107_5110 | conserved hypothetical protein                                                               | 157,470 | 157,667 |
| 182 | YDC107_5111 | putative korC protein                                                                        | 157,948 | 157,664 |
| 183 | YDC107_5112 | conserved hypothetical protein                                                               | 159,101 | 157,968 |
| 184 | YDC107_5113 | putative membrane protein                                                                    | 162,483 | 159,364 |
| 185 | YDC107_5114 | antidote-toxin recognition MazE family protein                                               | 162,790 | 163,020 |
| 186 | YDC107_5115 | PIN domain protein                                                                           | 163,032 | 163,433 |
| 187 | YDC107_5116 | AAA domain protein                                                                           | 165,733 | 163,595 |
| 188 | YDC107_5117 | conserved hypothetical protein                                                               | 166,198 | 167,193 |
| 189 | YDC107_5118 | conserved hypothetical protein                                                               | 167,236 | 168,129 |
| 190 | YDC107_5119 | putative transposase                                                                         | 168,769 | 168,266 |
| 191 | YDC107_5120 | <i>hsdR</i> type I restriction enzyme EcoR124II R protein                                    | 172,293 | 169,177 |
| 192 | YDC107_5121 | type I restriction modification DNA specificity domain protein                               | 173,659 | 172,415 |
| 193 | YDC107_5122 | <i>hsdM</i> type I restriction-modification system EcoR124II M subunit                       | 175,212 | 173,656 |
| 194 | YDC107_5123 | <i>phd</i> antitoxin Phd                                                                     | 175,395 | 175,616 |
| 195 | YDC107_5124 | <i>doc</i> toxin Doc                                                                         | 175,616 | 175,996 |
| 196 | YDC107_5125 | <i>pdca</i> putative PdcA                                                                    | 176,001 | 176,180 |
| 197 | YDC107_5126 | <i>pdcb</i> putative PdcB                                                                    | 176,208 | 176,567 |
| 198 | YDC107_5127 | integrase core domain protein                                                                | 176,530 | 176,904 |
| 199 | YDC107_5128 | <i>hsdR</i> type I site-specific deoxyribonuclease, HsdR family domain protein               | 177,171 | 176,854 |
| 200 | YDC107_5129 | conserved hypothetical protein                                                               | 178,379 | 177,399 |
| 201 | YDC107_5130 | hypothetical protein                                                                         | 178,457 | 178,546 |
| 202 | YDC107_5131 | amino acid permease family protein                                                           | 178,623 | 180,026 |
| 203 | YDC107_5132 | <i>mmuM</i> homocysteine S-methyltransferase                                                 | 180,013 | 180,945 |
| 204 | YDC107_5133 | ferric transporter                                                                           | 181,287 | 181,054 |
| 205 | YDC107_5134 | putative transposase                                                                         | 181,776 | 181,399 |
| 206 | YDC107_5135 | hypothetical protein                                                                         | 181,848 | 182,063 |
| 207 | YDC107_5136 | conserved hypothetical protein                                                               | 182,951 | 182,583 |
| 208 | YDC107_5137 | conserved hypothetical protein                                                               | 183,313 | 183,131 |

**Table S5.** Annotation of plasmid pYDC107\_85

| CDS | Locus       | Gene          | Predicted Protein Function                                       | Start  | Stop   |
|-----|-------------|---------------|------------------------------------------------------------------|--------|--------|
| 1   | YDC107_5138 |               | hypothetical protein                                             | 68     | 244    |
| 2   | YDC107_5139 | <i>pilU</i>   | type IV leader peptidase family protein                          | 1,744  | 1,088  |
| 3   | YDC107_5140 | <i>pilT</i>   | transglycosylase SLT domain protein, PilT                        | 2,289  | 1,729  |
| 4   | YDC107_5141 | <i>pilS</i>   | PilS N terminal family protein                                   | 2,913  | 2,299  |
| 5   | YDC107_5142 | <i>pilR</i>   | type II secretion system (T2SS), F family protein                | 4,015  | 2,930  |
| 6   | YDC107_5143 | <i>pilQ</i>   | type II/IV secretion system family protein                       | 5,581  | 4,028  |
| 7   | YDC107_5144 | <i>pilP</i>   | type IV pilus biogenesis family protein                          | 6,044  | 5,592  |
| 8   | YDC107_5145 | <i>pilO</i>   | pilin accessory family protein                                   | 7,326  | 6,031  |
| 9   | YDC107_5146 | <i>pilN</i>   | type IVB pilus formation outer membrane protein, R64 PilN family | 9,001  | 7,319  |
| 10  | YDC107_5147 | <i>pilM</i>   | PilM family Protein                                              | 9,452  | 9,015  |
| 11  | YDC107_5148 | <i>pilL</i>   | toxin co-regulated pilus biosynthesis Q family protein           | 10,519 | 9,452  |
| 12  | YDC107_5149 | <i>pilK</i>   | putative IncI1 conjugal transfer protein PilK                    | 11,441 | 10,848 |
| 13  | YDC107_5150 | <i>traC</i>   | conserved hypothetical protein                                   | 12,675 | 12,271 |
| 14  | YDC107_5151 | <i>nusG</i>   | transcription termination factor NusG family protein             | 13,462 | 12,929 |
| 15  | YDC107_5152 | <i>traA</i>   | conjugal transfer protein TraA                                   | 14,191 | 13,904 |
| 16  | YDC107_5153 | <i>repA</i>   | replication initiation protein                                   | 15,344 | 16,375 |
| 17  | YDC107_5154 | <i>yafA</i>   | putative YafA protein                                            | 17,953 | 17,444 |
| 18  | YDC107_5155 | <i>yafB</i>   | ProQ/FinO/YafB family protein                                    | 18,611 | 18,009 |
| 19  | YDC107_5156 | <i>yagA</i>   | putative YagA                                                    | 18,965 | 20,311 |
| 20  | YDC107_5157 |               | hypothetical protein                                             | 21,112 | 20,810 |
| 21  | YDC107_5158 | <i>parA</i>   | CobQ/CobB/MinD/ParA nucleotide binding domain protein            | 21,735 | 21,109 |
| 22  | YDC107_5159 | <i>impB</i>   | putative ImpB/UmuC DNA polymerase                                | 23,194 | 21,923 |
| 23  | YDC107_5160 | <i>impA</i>   | ImpA/UmuD peptidase S24-like family protein                      | 23,631 | 23,194 |
| 24  | YDC107_5161 | <i>impC</i>   | ImpC/DinI-like family protein                                    | 23,876 | 23,628 |
| 25  | YDC107_5162 |               | conserved hypothetical protein                                   | 24,270 | 25,196 |
| 26  | YDC107_5163 |               | conserved hypothetical protein                                   | 25,626 | 25,291 |
| 27  | YDC107_5164 | <i>parM</i>   | plasmid segregation protein ParM                                 | 25,964 | 26,944 |
| 28  | YDC107_5165 | <i>stbB</i>   | plasmid stability family protein, StbB                           | 26,947 | 27,369 |
| 29  | YDC107_5166 |               | DNA methylase family protein                                     | 27,760 | 28,443 |
| 30  | YDC107_5167 |               | conserved hypothetical protein                                   | 28,444 | 28,665 |
| 31  | YDC107_5168 |               | conserved hypothetical protein                                   | 28,679 | 29,113 |
| 32  | YDC107_5169 | <i>ycfA</i>   | putative YcfA                                                    | 29,158 | 29,928 |
| 33  | YDC107_5170 |               | conserved hypothetical protein                                   | 29,903 | 30,373 |
| 34  | YDC107_5171 |               | antirestriction family protein                                   | 30,346 | 30,771 |
| 35  | YDC107_5172 |               | conserved hypothetical protein                                   | 30,818 | 31,240 |
| 36  | YDC107_5173 | <i>ycaA</i>   | putative YcaA                                                    | 31,237 | 31,428 |
| 37  | YDC107_5174 | <i>ssb</i>    | single-stranded DNA-binding family protein                       | 32,197 | 32,724 |
| 38  | YDC107_5175 |               | conserved hypothetical protein                                   | 32,782 | 33,015 |
| 39  | YDC107_5176 |               | ParB/RepB/Spo0J family partition domain protein                  | 33,074 | 35,032 |
| 40  | YDC107_5177 | <i>psiB</i>   | protein PsiB                                                     | 35,085 | 35,519 |
| 41  | YDC107_5178 | <i>psiA</i>   | PsiA family protein                                              | 35,516 | 36,235 |
| 42  | YDC107_5179 | <i>ygaA</i>   | putative YgaA protein                                            | 36,232 | 36,828 |
| 43  | YDC107_5180 | <i>ardA</i>   | antirestriction family protein ArdA                              | 37,290 | 37,790 |
| 44  | YDC107_5181 | <i>ydfA</i>   | putative YdfA                                                    | 38,519 | 38,953 |
| 45  | YDC107_5182 | <i>ydfB</i>   | putative YdfB                                                    | 39,047 | 39,313 |
| 46  | YDC107_5183 | <i>ccgAll</i> | putative CcgAll                                                  | 39,490 | 39,879 |
| 47  | YDC107_5184 |               | transposase                                                      | 39,876 | 40,778 |
| 48  | YDC107_5185 |               | conserved hypothetical protein                                   | 40,840 | 41,034 |
| 49  | YDC107_5186 | <i>ygeA</i>   | putative YgeA protein                                            | 41,316 | 41,065 |
| 50  | YDC107_5187 | <i>ydiA</i>   | methyltransferase domain protein YdiA                            | 41,896 | 42,744 |
| 51  | YDC107_5188 |               | conserved hypothetical protein                                   | 43,166 | 42,831 |
| 52  | YDC107_5189 | <i>nika</i>   | Nika protein                                                     | 43,400 | 43,732 |

|    |             |                             |                                                               |        |        |
|----|-------------|-----------------------------|---------------------------------------------------------------|--------|--------|
| 53 | YDC107_5190 | <i>nikB</i>                 | relaxase/Mobilisation nuclease domain protein NikB            | 43,743 | 46,442 |
| 54 | YDC107_5191 | <i>trbC</i>                 | conjugal transfer protein TrbC                                | 48,771 | 46,480 |
| 55 | YDC107_5192 | <i>trbB</i>                 | conjugal transfer protein TrbB                                | 49,834 | 48,764 |
| 56 | YDC107_5193 | <i>trbA</i>                 | putative TrbA                                                 | 51,061 | 49,853 |
| 57 | YDC107_5194 | <i>finQ</i>                 | putative FinQ                                                 | 52,150 | 51,368 |
| 58 | YDC107_5195 | <i>blc</i>                  | outer membrane lipoprotein Blc                                | 53,193 | 52,660 |
| 59 | YDC107_5196 | <i>sugE</i>                 | quaternary ammonium compound-resistance protein SugE, partial | 52,346 | 52,663 |
| 60 | YDC107_5197 | <i>bla<sub>CMY-44</sub></i> | beta-lactamase CMY-44                                         | 54,420 | 53,287 |
| 61 | YDC107_5198 |                             | transposase DDE domain group 1 family protein                 | 56,006 | 54,744 |
| 62 | YDC107_5199 | <i>finQ</i>                 | FinQ domain protein                                           | 56,533 | 56,159 |
| 63 | YDC107_5200 |                             | conserved hypothetical protein                                | 57,208 | 56,996 |
| 64 | YDC107_5201 |                             | Hok/Gef family protein                                        | 56,851 | 57,006 |
| 65 | YDC107_5202 |                             | conserved hypothetical protein                                | 57,562 | 57,804 |
| 66 | YDC107_5203 |                             | conserved hypothetical protein                                | 58,045 | 57,869 |
| 67 | YDC107_5204 |                             | HEAT-like repeat family protein                               | 58,437 | 58,646 |
| 68 | YDC107_5205 |                             | putative surface exclusion protein                            | 59,380 | 58,718 |
| 69 | YDC107_5206 | <i>traY</i>                 | conjugal transfer/type IV secretion DotA/TraY family protein  | 61,619 | 59,451 |
| 70 | YDC107_5207 | <i>traX</i>                 | putative TraX-like protein                                    | 62,300 | 61,716 |
| 71 | YDC107_5208 | <i>traW</i>                 | putative TraW lipoprotein                                     | 63,531 | 62,329 |
| 72 | YDC107_5209 | <i>traV</i>                 | putative TraV protein                                         | 64,112 | 63,498 |
| 73 | YDC107_5210 |                             | AAA-like domain protein                                       | 67,156 | 64,112 |
| 74 | YDC107_5211 | <i>traT</i>                 | putative incl1 conjugal transfer protein TraT                 | 68,046 | 67,246 |
| 75 | YDC107_5212 | <i>traS</i>                 | putative incl1 conjugal transfer protein TraS                 | 68,218 | 68,030 |
| 76 | YDC107_5213 | <i>traR</i>                 | putative TraR protein                                         | 68,686 | 68,282 |
| 77 | YDC107_5214 | <i>traQ</i>                 | putative TraQ protein                                         | 69,264 | 68,737 |
| 78 | YDC107_5215 | <i>traP</i>                 | putative TraP protein                                         | 69,968 | 69,264 |
| 79 | YDC107_5216 | <i>traO</i>                 | putative TraO protein                                         | 71,257 | 69,968 |
| 80 | YDC107_5217 | <i>traN</i>                 | putative TraN protein                                         | 72,243 | 71,260 |
| 81 | YDC107_5218 | <i>traM</i>                 | putative TraM protein                                         | 72,946 | 72,254 |
| 82 | YDC107_5219 | <i>traL</i>                 | putative TraL protein                                         | 73,290 | 72,943 |
| 83 | YDC107_5220 |                             | putative DNA primase                                          | 77,075 | 73,308 |
| 84 | YDC107_5221 | <i>nuc</i>                  | endonuclease                                                  | 77,716 | 77,165 |
| 85 | YDC107_5222 | <i>traK</i>                 | putative TraK protein                                         | 78,021 | 77,731 |
| 86 | YDC107_5223 | <i>traJ</i>                 | plasmid transfer ATPase TraJ                                  | 79,166 | 78,018 |
| 87 | YDC107_5224 | <i>traI</i>                 | putative TraI lipoprotein                                     | 79,981 | 79,163 |
| 88 | YDC107_5225 | <i>traH</i>                 | putative TraH protein                                         | 80,436 | 79,978 |
| 89 | YDC107_5226 | <i>traG</i>                 | putative TraG protein                                         | 81,412 | 80,831 |
| 90 | YDC107_5227 | <i>traF</i>                 | F plasmid transfer operon, TraF, family protein               | 82,677 | 81,475 |
| 91 | YDC107_5228 | <i>traE</i>                 | putative TraE protein                                         | 83,587 | 82,763 |
| 92 | YDC107_5229 |                             | phage integrase family protein                                | 84,892 | 83,738 |



**Table S6.** Annotation of plasmid pYDC107\_70

| CDS | Locus       | Gene                       | Predicted Protein Function                                                                       | Start  | Stop   |
|-----|-------------|----------------------------|--------------------------------------------------------------------------------------------------|--------|--------|
| 1   | YDC107_5230 | <i>repA</i>                | initiator replication family protein, IncN                                                       | 1      | 720    |
| 2   | YDC107_5231 |                            | conserved hypothetical protein                                                                   | 765    | 2,255  |
| 3   | YDC107_5232 |                            | conserved hypothetical protein                                                                   | 2,574  | 2,332  |
| 4   | YDC107_5233 |                            | hypothetical protein                                                                             | 2,680  | 2,528  |
| 5   | YDC107_5234 |                            | resolvase, N terminal domain protein                                                             | 3,246  | 2,677  |
| 6   | YDC107_5235 | <i>intl1</i>               | integron integrase family protein                                                                | 4,652  | 3,639  |
| 7   | YDC107_5236 | <i>dfrA14</i>              | dihydrofolate reductase type 1                                                                   | 4,808  | 5,281  |
| 8   | YDC107_5237 | <i>mobC</i>                | bacterial mobilization family protein                                                            | 5,502  | 5,768  |
| 9   | YDC107_5238 |                            | hypothetical protein                                                                             | 5,768  | 5,878  |
| 10  | YDC107_5239 | <i>tnpA</i>                | transposase IS66 family protein                                                                  | 5,911  | 6,675  |
| 11  | YDC107_5240 | <i>ecoRII</i>              | type-2 restriction enzyme EcoRII                                                                 | 6,942  | 8,150  |
| 12  | YDC107_5241 | <i>dcm</i>                 | DNA (cytosine-5-)-methyltransferase family protein                                               | 9,617  | 8,184  |
| 13  | YDC107_5242 |                            | conserved hypothetical protein                                                                   | 10,205 | 9,999  |
| 14  | YDC107_5243 |                            | restriction endonuclease family protein                                                          | 10,719 | 10,210 |
| 15  | YDC107_5244 |                            | conserved hypothetical protein                                                                   | 11,218 | 10,907 |
| 16  | YDC107_5245 | <i>kikA</i>                | putative KikA protein                                                                            | 11,568 | 11,254 |
| 17  | YDC107_5246 |                            | conserved hypothetical protein                                                                   | 11,909 | 11,565 |
| 18  | YDC107_5247 | <i>korB</i>                | H-NS histone family protein                                                                      | 12,230 | 11,925 |
| 19  | YDC107_5248 | <i>traL</i>                | transglycosylase SLT domain protein                                                              | 12,339 | 13,073 |
| 20  | YDC107_5249 | <i>korA</i>                | putative KorA                                                                                    | 13,082 | 13,363 |
| 21  | YDC107_5250 | <i>traM</i>                | putative membrane protein                                                                        | 13,373 | 13,666 |
| 22  | YDC107_5251 | <i>traA</i>                | type IV secretory pathway, VirB3-like family protein                                             | 13,716 | 14,033 |
| 23  | YDC107_5252 | <i>traB</i>                | CagE, TrbE, VirB, component of type IV transporter system family protein                         | 14,033 | 15,142 |
| 24  | YDC107_5253 | <i>arsR</i>                | bacterial regulatory, ArsR family protein                                                        | 15,981 | 15,784 |
| 25  | YDC107_5254 | <i>tnpA</i>                | putative p12 protein                                                                             | 15,210 | 15,836 |
| 26  | YDC107_5255 |                            | hypothetical protein                                                                             | 16,544 | 16,209 |
| 27  | YDC107_5256 | <i>nuc</i>                 | endonuclease                                                                                     | 17,242 | 16,709 |
| 28  | YDC107_5257 | <i>traG</i>                | type II/IV secretion system family protein                                                       | 18,237 | 17,242 |
| 29  | YDC107_5258 | <i>traF</i>                | TraF protein                                                                                     | 19,439 | 18,279 |
| 30  | YDC107_5259 | <i>traO</i>                | TraO protein                                                                                     | 20,323 | 19,439 |
| 31  | YDC107_5260 | <i>traE</i>                | VirB8 family protein                                                                             | 21,032 | 20,334 |
| 32  | YDC107_5261 | <i>traD</i>                | TrbL/VirB6 plasmid conjugal transfer family protein                                              | 22,291 | 21,251 |
| 33  | YDC107_5262 | <i>eex</i>                 | putative entry exclusion protein, Eex                                                            | 22,534 | 22,307 |
| 34  | YDC107_5263 | <i>traC</i>                | TraC                                                                                             | 23,255 | 22,542 |
| 35  | YDC107_5264 | <i>traB</i>                | type IV secretion/conjugal transfer ATPase, VirB4 family protein                                 | 24,946 | 23,273 |
| 36  | YDC107_5265 |                            | putative transposase                                                                             | 25,524 | 24,916 |
| 37  | YDC107_5266 |                            | Tn3 transposase DDE domain protein                                                               | 25,741 | 27,519 |
| 38  | YDC107_5267 |                            | transposase family protein                                                                       | 27,598 | 28,602 |
| 39  | YDC107_5268 |                            | integrase                                                                                        | 28,960 | 28,784 |
| 40  | YDC107_5269 | <i>sul2</i>                | dihydropteroate synthase                                                                         | 29,290 | 30,105 |
| 41  | YDC107_5270 | <i>aph(3'')-Ib</i>         | Aminoglycoside 3'-phosphotransferase (EC 2.7.1.95) @ Streptomycin 3'-kinase StrA (EC 2.7.1.87)   | 30,166 | 30,969 |
| 42  | YDC107_5271 | <i>aph(6)-Ib</i>           | Aminoglycoside 3'-phosphotransferase 2 (EC 2.7.1.95) @ Streptomycin 3'-kinase StrB (EC 2.7.1.87) | 31,176 | 31,805 |
| 43  | YDC107_5272 | <i>bla<sub>TEM-1</sub></i> | beta-lactamase TEM                                                                               | 33,386 | 32,526 |
| 44  | YDC107_5273 |                            | resolvase, N terminal domain protein                                                             | 33,820 | 33,569 |
| 45  | YDC107_5274 | <i>bla<sub>OXA-9</sub></i> | penicillin binding transpeptidase domain protein                                                 | 34,910 | 34,086 |
| 46  | YDC107_5275 | <i>aadA</i>                | nucleotidyltransferase domain protein                                                            | 35,746 | 34,970 |
| 47  | YDC107_5276 | <i>aac(6)-Ib</i>           | aminoglycoside N(6)-acetyltransferase type 1                                                     | 36,433 | 35,828 |
| 48  | YDC107_5277 | <i>tnpR</i>                | transposon Tn3 resolvase                                                                         | 37,173 | 36,616 |
| 49  | YDC107_5278 |                            | transposase                                                                                      | 37,337 | 38,245 |
| 50  | YDC107_5279 |                            | phage integrase family protein                                                                   | 39,841 | 38,288 |
| 51  | YDC107_5280 |                            | transposase                                                                                      | 40,113 | 43,142 |
| 52  | YDC107_5281 |                            | integrase core domain protein                                                                    | 43,249 | 44,274 |
| 53  | YDC107_5282 |                            | PhoH-like family protein                                                                         | 44,271 | 45,050 |
| 54  | YDC107_5283 |                            | conserved hypothetical protein                                                                   | 45,047 | 45,385 |
| 55  | YDC107_5284 | <i>bla<sub>KPC-3</sub></i> | carbapenem-hydrolyzing beta-lactamase KPC-3                                                      | 45,437 | 46,318 |
| 56  | YDC107_5285 |                            | transposase                                                                                      | 47,887 | 46,568 |
| 57  | YDC107_5286 |                            | Tn3 transposase DDE domain protein                                                               | 48,338 | 50,353 |
| 58  | YDC107_5287 |                            | putative transposase                                                                             | 50,406 | 51,032 |
| 59  | YDC107_5288 |                            | Tn3 transposase DDE domain protein                                                               | 51,068 | 51,496 |
| 60  | YDC107_5289 | <i>fipA</i>                | putative FipA                                                                                    | 51,871 | 51,506 |
| 61  | YDC107_5290 | <i>traI</i>                | mobilization protein TraI                                                                        | 55,107 | 51,871 |
| 62  | YDC107_5291 | <i>traJ</i>                | TraJ                                                                                             | 56,636 | 55,107 |
| 63  | YDC107_5292 | <i>traK</i>                | putative conjugal transfer protein, TraK                                                         | 57,054 | 56,638 |
| 64  | YDC107_5293 | <i>stbA</i>                | putative StbA                                                                                    | 57,545 | 57,964 |
| 65  | YDC107_5294 | <i>stbB</i>                | putative StbB                                                                                    | 57,973 | 58,689 |
| 66  | YDC107_5295 | <i>stbC</i>                | putative StbC protein                                                                            | 58,691 | 59,059 |
| 67  | YDC107_5296 | <i>orfD</i>                | putative OrfD                                                                                    | 59,241 | 59,585 |
| 68  | YDC107_5297 | <i>ccgAII</i>              | putative CcgAII                                                                                  | 60,016 | 59,696 |
| 69  | YDC107_5298 | <i>ccgAI</i>               | putative CcgAI protein                                                                           | 60,250 | 60,071 |
| 70  | YDC107_5299 | <i>ardA</i>                | antirestriction family protein                                                                   | 61,486 | 60,977 |
| 71  | YDC107_5300 |                            | conserved hypothetical protein                                                                   | 62,511 | 62,254 |
| 72  | YDC107_5301 |                            | hypothetical protein                                                                             | 62,529 | 62,819 |
| 73  | YDC107_5302 |                            | conserved hypothetical protein                                                                   | 63,171 | 62,839 |
| 74  | YDC107_5303 |                            | conserved hypothetical protein                                                                   | 63,302 | 63,631 |
| 75  | YDC107_5304 |                            | conserved hypothetical protein                                                                   | 64,092 | 63,733 |
| 76  | YDC107_5305 | <i>ccgD</i>                | putative CcgD protein                                                                            | 64,385 | 64,089 |
| 77  | YDC107_5306 |                            | conserved hypothetical protein                                                                   | 65,043 | 64,498 |
| 78  | YDC107_5307 | <i>ccgEII</i>              | putative CcgEII                                                                                  | 65,510 | 65,271 |
| 79  | YDC107_5308 | <i>ardR</i>                | putative antirestriction protein                                                                 | 65,873 | 65,520 |
| 80  | YDC107_5309 | <i>ardB</i>                | antirestriction family protein                                                                   | 66,407 | 65,982 |
| 81  | YDC107_5310 | <i>mucA</i>                | peptidase S24-like family protein                                                                | 66,822 | 67,262 |
| 82  | YDC107_5311 | <i>mucB</i>                | conserved hypothetical protein                                                                   | 67,250 | 68,515 |
| 83  | YDC107_5312 | <i>mpr</i>                 | SprT-like family protein                                                                         | 68,666 | 69,457 |
| 84  | YDC107_5313 | <i>ardK</i>                | putative ArdK protein                                                                            | 69,813 | 69,472 |

**Table S7.** Annotation of plasmid pYDC107\_41

| CDS | Locus       | Gene        | Predicted Protein Function                                       | Start  | Stop   |
|-----|-------------|-------------|------------------------------------------------------------------|--------|--------|
| 1   | YDC107_5314 | <i>trfA</i> | replication initiator A family protein                           | 1      | 879    |
| 2   | YDC107_5315 | <i>klcA</i> | KlcA                                                             | 2,031  | 2,498  |
| 3   | YDC107_5316 | <i>klcB</i> | putative protein KlcB                                            | 2,546  | 3,664  |
| 4   | YDC107_5317 |             | hypothetical protein                                             | 3,930  | 3,679  |
| 5   | YDC107_5318 | <i>kleE</i> | predicted KleE protein                                           | 4,023  | 4,346  |
| 6   | YDC107_5319 |             | conserved hypothetical protein                                   | 4,422  | 4,673  |
| 7   | YDC107_5320 |             | zeta toxin family protein                                        | 4,673  | 5,263  |
| 8   | YDC107_5321 | <i>trfB</i> | TrfB transcriptional repressor protein                           | 5,465  | 5,809  |
| 9   | YDC107_5322 | <i>parA</i> | CobQ/CobB/MinD/ParA nucleotide binding domain protein            | 5,818  | 6,576  |
| 10  | YDC107_5323 | <i>korB</i> | transcriptional repressor protein KorB                           | 6,576  | 7,589  |
| 11  | YDC107_5324 | <i>traO</i> | conjugal transfer protein TraO                                   | 8,170  | 8,523  |
| 12  | YDC107_5325 | <i>traN</i> | putative TraN                                                    | 8,545  | 9,225  |
| 13  | YDC107_5326 | <i>traM</i> | protein TraM                                                     | 9,823  | 9,383  |
| 14  | YDC107_5327 | <i>traL</i> | protein TraL                                                     | 10,608 | 9,823  |
| 15  | YDC107_5328 | <i>traK</i> | putative TraK                                                    | 11,042 | 10,608 |
| 16  | YDC107_5329 | <i>traJ</i> | protein TraJ                                                     | 11,392 | 11,751 |
| 17  | YDC107_5330 | <i>tral</i> | protein Tral                                                     | 11,780 | 14,413 |
| 18  | YDC107_5331 |             | type IV secretory system conjugal DNA transfer family protein    | 14,410 | 14,565 |
| 19  | YDC107_5332 | <i>traG</i> | conjugal transfer protein TraG                                   | 14,552 | 16,495 |
| 20  | YDC107_5333 | <i>traF</i> | conjugal transfer signal peptidase TraF                          | 16,492 | 17,025 |
| 21  | YDC107_5334 |             | conserved hypothetical protein                                   | 17,045 | 17,374 |
| 22  | YDC107_5335 |             | hypothetical protein                                             | 17,371 | 17,697 |
| 23  | YDC107_5336 | <i>topB</i> | DNA topoisomerase III family protein                             | 17,694 | 19,724 |
| 24  | YDC107_5337 | <i>traD</i> | putative TraD conjugal transfer protein                          | 19,740 | 19,925 |
| 25  | YDC107_5338 | <i>traC</i> | DNA primase TraC                                                 | 19,931 | 23,749 |
| 26  | YDC107_5339 |             | putative membrane protein                                        | 23,913 | 24,287 |
| 27  | YDC107_5340 |             | conserved hypothetical protein                                   | 25,361 | 24,375 |
| 28  | YDC107_5341 |             | hypothetical protein                                             | 25,642 | 25,436 |
| 29  | YDC107_5342 |             | putative membrane protein                                        | 25,932 | 26,129 |
| 30  | YDC107_5343 |             | hypothetical protein                                             | 27,102 | 26,218 |
| 31  | YDC107_5344 |             | putative membrane protein                                        | 27,332 | 27,697 |
| 32  | YDC107_5345 |             | resolvase, N terminal domain protein                             | 27,781 | 28,395 |
| 33  | YDC107_5346 |             | helix-turn-helix transcriptional regulator                       | 28,427 | 28,795 |
| 34  | YDC107_5347 |             | transglycosylase SLT domain, conjugal transfer protein           | 29,733 | 28,960 |
| 35  | YDC107_5348 |             | conserved hypothetical protein                                   | 30,057 | 29,749 |
| 36  | YDC107_5349 | <i>trbL</i> | P-type conjugal transfer protein TrbL                            | 31,621 | 30,068 |
| 37  | YDC107_5350 | <i>trbJ</i> | P-type conjugal transfer protein TrbJ                            | 32,615 | 31,833 |
| 38  | YDC107_5351 | <i>trbI</i> | bacterial conjugation TrbI-like family protein                   | 34,022 | 32,628 |
| 39  | YDC107_5352 | <i>trbH</i> | conjugal transfer TrbH family protein                            | 34,367 | 34,026 |
| 40  | YDC107_5353 | <i>trbG</i> | P-type conjugal transfer protein TrbG                            | 35,362 | 34,472 |
| 41  | YDC107_5354 | <i>trbF</i> | VirB8 family protein                                             | 36,085 | 35,378 |
| 42  | YDC107_5355 | <i>trbE</i> | type IV secretion/conjugal transfer ATPase, VirB4 family protein | 38,625 | 36,082 |
| 43  | YDC107_5356 | <i>trbD</i> | type IV secretory pathway, VirB3-like family protein             | 38,948 | 38,622 |
| 44  | YDC107_5357 | <i>trbC</i> | TrbC/VIRB2 family protein                                        | 39,334 | 38,951 |
| 45  | YDC107_5358 | <i>trbB</i> | P-type conjugal transfer ATPase TrbB                             | 40,404 | 39,448 |
| 46  | YDC107_5359 | <i>trbA</i> | helix-turn-helix domain protein, TrbA                            | 40,991 | 40,587 |
| 47  | YDC107_5360 | <i>ssb</i>  | single-stranded DNA-binding family protein                       | 41,096 | 41,470 |
